# Supplementary material for: Bad News: Analysis of the Quality of Information on Influenza Prevention Returned by Google in English and Italian
Source: Front Immunol. 2015 Dec 8;6:616. doi: 10.3389/fimmu.2015.00616 (PMC4672033; doi:10.3389/fimmu.2015.00616)
Supplement: Supplementary file 1 [file Data_Sheet_1.XLSX]

## Sheet: prevention-EN
Website	Category	Flu Jab	App Drug	Lifestyle	Hygiene	Supplements	Nutrition	CAM Herbs	CAM Practices	Devices	Authorship	Attribution	Disclosure	Currency	Total JAMA	Ranking	Archive
http://www.cdc.gov/flu/protect/preventing.htm	Government	1	1	0	1	0	0	0	0	0	0	0	1	1	2	1	http://www.webcitation.org/6bjdagdd0
http://www.cdc.gov/flu/protect/habits.htm	Government	1	1	1	1	0	1	0	0	0	0	0	1	1	2	2	http://www.webcitation.org/6bjddeZks
http://www.flu.gov/prevention-vaccination/prevention/	Government	1	1	1	1	0	1	0	0	0	0	0	1	0	1	3	http://www.webcitation.org/6bjdfEHSr
http://www.health.com/health/gallery/0,,20752945,00.html	Journalistic	0	0	1	1	1	1	0	1	0	1	0	0	0	1	4	http://www.webcitation.org/6bjdhSnZ5
http://www.webmd.com/cold-and-flu/features/preventing-cold-and-flu-how-doctors-keep-germs-at-bay	Portal	0	0	1	1	0	0	1	1	0	1	1	1	1	4	5	http://www.webcitation.org/6bjdl113v
http://www.webmd.com/cold-and-flu/flu-guide/cold_flu_stopping_germs_work	Portal	1	1	1	1	0	1	0	0	0	1	1	1	1	4	6	http://www.webcitation.org/6bjdnLDiT
http://www.webmd.com/cold-and-flu/11-tips-prevent-cold-flu	Portal	1	0	1	1	0	1	0	0	0	1	1	1	1	4	7	http://www.webcitation.org/6bjdrEK2r
http://familydoctor.org/familydoctor/en/kids/vaccines/preventing-the-flu.html	Professional	1	1	0	1	0	1	0	0	0	0	1	1	1	3	8	http://www.webcitation.org/6bjdtp5BX
http://www.mayoclinic.org/diseases-conditions/flu/basics/prevention/con-20035101	Professional	1	0	0	1	0	0	0	0	0	0	1	1	1	3	9	http://www.webcitation.org/6bjdz777q
http://www.foxnews.com/health/2013/11/21/20-surprising-ways-to-prevent-colds-and-flu/	Journalistic	0	0	1	1	1	1	0	1	0	1	0	0	1	2	10	not available
http://www.nhs.uk/Conditions/Flu/Pages/Prevention.aspx	Government	1	1	0	1	0	0	0	0	0	0	0	1	1	2	11	http://www.webcitation.org/6bje6lnmo
http://www.healthychildren.org/English/safety-prevention/immunizations/Pages/Preventing-the-Flu-Resources-for-Parents-Child-Care-Providers.aspx	Professional	1	0	0	1	0	0	0	0	0	0	0	1	1	2	12	http://www.webcitation.org/6bje9bKkq
http://www.prevention.com/health/health-concerns/colds-flu-prevention-strategies-and-immune-boosters	Journalistic	1	0	1	1	1	1	1	1	0	1	0	0	0	1	13	http://www.webcitation.org/6bjeEQjA9
http://www.concentra.com/patients/health-library/influenza/	Professional	1	1	1	1	0	1	0	0	0	0	0	1	0	1	14	http://www.webcitation.org/6bjeH58Pm
http://www.womenshealthmag.com/health/prevent-the-flu	Journalistic	0	0	1	1	0	1	0	0	1	0	0	0	0	0	15	http://www.webcitation.org/6bjeKmspL
http://www.motherearthnews.com/natural-health/colds-and-flu-zm0z12djzhir.aspx	Journalistic	0	0	1	1	0	1	1	0	1	1	0	0	1	2	16	http://www.webcitation.org/6bjeNMaSs
http://health.howstuffworks.com/diseases-conditions/cold-flu/ten-ways-to-avoid-the-flu.htm	Other	1	0	1	1	1	0	0	0	0	0	0	0	0	0	17	http://www.webcitation.org/6bjeR7WVd
http://www.drweil.com/drw/u/id/ART00672	Commercial	0	0	1	1	1	1	0	0	0	0	0	0	1	1	18	http://www.webcitation.org/6bjeTfVJA
http://www.lung.org/lung-disease/influenza/preventing-influenza.html	No-profit	1	0	0	1	0	0	0	0	0	0	0	1	0	1	19	http://www.webcitation.org/6bjeW1cmu
http://www.healthline.com/health/cold-flu/prevention-tips	Professional	1	0	1	1	1	1	1	0	0	1	1	1	1	4	20	http://www.webcitation.org/6btyXflGo
http://www.healthline.com/health/cold-flu/preventing-flu-school	Professional	1	0	0	1	0	0	0	0	0	1	1	1	1	4	21
http://greatist.com/health/treating-preventing-flu	Journalistic	1	1	1	1	0	1	0	0	0	1	0	0	1	2	22
https://uhs.berkeley.edu/home/news/pdf/flutips.pdf	Professional	0	0	1	1	0	1	0	0	0	0	0	0	0	0	23
http://abcnews.go.com/Health/ColdandFluNews/story?id=5781649	Journalistic	1	1	1	1	0	0	0	0	1	1	0	0	1	2	24
http://www.wikihow.com/Prevent-a-Cold-or-the-Flu	Other	1	0	1	1	1	1	1	0	0	0	1	0	1	2	25
https://www.caring.com/articles/flu-free-flying	No-profit	0	0	1	1	0	1	0	0	1	1	0	1	0	2	26
http://en.wikipedia.org/wiki/Influenza_prevention	Other	1	0	1	1	0	1	0	0	1	0	1	1	0	2	27
http://www.huffingtonpost.com/2014/07/17/cold-flu-prevention-natural-immune-boosters_n_2474430.html	Journalistic	1	0	1	1	1	1	0	0	1	1	0	0	1	2	28
http://www.ncbi.nlm.nih.gov/pubmed/20614424	Professional	1	0	0	0	0	0	0	0	0	1	1	1	1	4	29
http://www.health.gov.nl.ca/health/publichealth/h1n1_old/flu_prevention_checklist%20.pdf	Government	1	0	0	1	0	0	0	0	0	0	0	1	0	1	31
http://flu.oregon.gov/	Government	1	0	1	1	0	1	0	0	1	0	0	1	0	1	32
http://www.health.qld.gov.au/flu/	Government	1	0	0	1	0	0	0	0	0	0	0	1	1	2	33
http://www.thecochranelibrary.com/details/collection/978807/Influenza-evidence-from-Cochrane-Reviews.html	Professional	1	1	0	1	0	0	0	0	1	1	1	1	1	4	34
http://www.mindbodygreen.com/0-7025/6-doctor-recommended-tips-for-preventing-the-flu-naturally.html	Journalistic	0	0	1	1	1	1	1	0	0	1	0	0	1	2	35
http://www.oncallinternational.com/blog/how-to-avoid-the-flu-while-traveling-and-what-to-do-if-you-get-it/	Commercial	1	1	1	1	0	0	0	0	0	1	0	0	1	2	37
http://www.drdavidwilliams.com/nutrients-preventing-cold-flu/	Commercial	0	0	0	0	1	1	1	0	0	0	0	0	0	0	39
http://www.salon.com/2014/09/11/5_bogus_excuses_people_use_to_avoid_the_flu_vaccine/	Journalistic	1	0	0	0	0	0	0	0	0	1	0	0	0	1	40
http://www.calgary.ca/CSPS/Fire/Pages/Calgary-Emergency-Management-Agency/Preventing-the-spread-of-influenza.aspx	Government	1	0	1	1	0	1	0	0	0	0	0	1	0	1	41
http://healthvermont.gov/prevent/flu/	Government	1	0	1	1	0	1	0	0	0	0	0	1	0	1	42
http://www.sciencedaily.com/releases/2014/10/141021085108.htm	Journalistic	1	0	0	0	0	0	0	0	0	0	1	0	1	2	43
http://www.dana-farber.org/Health-Library/Preventing-the-flu.aspx	Professional	1	0	0	1	0	0	0	0	0	0	0	0	0	0	44
http://www.naturalnews.com/019194_flu_the_health.html	Journalistic	0	0	1	1	1	1	0	0	0	1	0	0	1	2	45
http://www.mcmasteroptimalaging.org/citizens/blogs/detail/blog/2014/09/30/preventing-the-flu-do-vaccinations-really-work	Portal	1	0	0	1	0	0	0	0	0	1	1	1	1	4	46
http://www.parenting.com/health-guide/cold-flu/prevention	Journalistic	1	0	1	1	0	1	0	0	0	0	0	0	0	0	47
http://www.everydayhealth.com/cold-and-flu-pictures/ways-to-prevent-colds-and-flu.aspx	Commercial	1	0	1	1	0	1	0	0	0	1	0	0	1	2	48
http://www.cancertutor.com/preventingflu/	Commercial	0	0	0	0	1	0	1	1	1	1	0	0	1	2	49
http://www.cdcfoundation.org/businesspulse/flu-prevention-infographic	Government	1	1	0	1	0	0	0	0	0	1	1	0	0	2	50
http://www.contac.com/cold-flu-hq/avoiding-a-cold-or-flu	Commercial	1	0	0	1	0	0	0	0	0	0	1	0	0	1	51
http://articles.mercola.com/sites/articles/archive/2011/11/13/could-a-cup-or-more-of-this-a-day-keep-the-flu-away.aspx	Commercial	0	0	1	1	1	1	0	0	0	1	1	0	1	3	52
http://www.cnn.com/2013/01/10/health/protect-children-flu/	Journalistic	1	0	1	1	0	1	0	0	0	1	0	0	1	2	53
http://www.wpsdlocal6.com/story/27560900/preventing-the-flu-this-season	Journalistic	1	0	0	1	0	0	0	0	0	1	0	0	1	2	54
http://www.snopes.com/medical/swineflu/onion.asp	Other	0	0	0	0	0	0	0	0	0	0	1	0	1	2	55
http://www.publichealth.va.gov/PUBLICHEALTH/flu/prevention/index.asp	Government	1	0	0	1	0	0	0	0	0	0	0	1	0	1	56
http://www.seiu.org/a/healthcare/flu.php	Other	1	0	0	1	0	0	0	0	1	0	0	1	0	1	57
http://www.ageuk.org.uk/health-wellbeing/conditions-illnesses/how-to-avoid-catching-colds-or-flu/	No-profit	1	0	1	1	0	1	0	0	1	0	0	1	0	1	58
http://www.health.gov.au/fluandyou	Government	1	0	0	1	0	0	0	0	1	0	0	1	1	2	59
http://www.maine.gov/labor/posters/flu.pdf	Government	0	0	0	1	0	0	0	0	0	0	0	1	0	1	61
http://theconversation.com/ginseng-could-be-an-effective-way-to-prevent-the-flu-25562	Journalistic	0	0	0	0	0	0	1	0	0	1	0	1	1	3	62
http://www.myvmc.com/lifestyles/cold-and-flu-prevention-at-work/	Professional	1	0	1	1	0	1	0	0	1	1	1	1	1	4	63
http://www.besthealthmag.ca/get-healthy/cold-and-flu/7-ways-to-prevent-the-flu	Journalistic	1	0	1	1	0	1	0	0	0	0	0	0	0	0	64
http://healthycanadians.gc.ca/diseases-conditions-maladies-affections/disease-maladie/flu-grippe/index-eng.php	Government	1	0	0	0	0	0	0	0	0	0	0	1	1	2	65
http://www.uptodate.com/contents/influenza-prevention-beyond-the-basics	Professional	1	1	0	1	0	0	0	0	0	1	1	1	1	4	66
http://www.takepart.com/photos/8-easy-ways-make-it-through-flu-season-without-getting-sick	Journalistic	0	0	1	1	0	0	0	0	0	1	0	0	1	2	67
http://www.pennlive.com/midstate/index.ssf/2014/12/flu_colds_tips_remedies_tamifl.html	Journalistic	1	1	1	1	1	1	1	0	0	1	0	0	1	2	68
http://www.bates.edu/health/health-information/avoiding-seasonal-flu/	Professional	1	1	0	1	0	1	0	0	0	0	0	1	0	1	69
http://www.rodalenews.com/how-prevent-flu	Journalistic	1	0	1	1	0	0	0	0	1	1	0	0	0	1	70
http://publichealth.lacounty.gov/ip/flu/ADM143_Employer%20Flu%20Tipsheet_Final.pdf	Government	1	0	0	1	0	0	0	0	0	0	1	1	0	2	71
http://www.sharecare.com/health/cold-and-flu/can-influenza-be-prevented	Commercial	1	0	1	1	1	1	0	0	0	1	0	0	0	1	72
http://kellythekitchenkop.com/healthcare-workers-how-to-avoid-the-flu-shot-and-not-get-fired-part-2.html	Commercial	0	0	0	0	0	0	0	0	1	1	0	0	1	2	73
http://www.cuyahogabdd.org/en-US/Preventing-Flu.aspx	Government	1	0	0	1	0	0	0	0	0	0	0	1	0	1	74
http://newoldage.blogs.nytimes.com/2013/01/16/in-flu-seasonuse-a-mask-but-which-one/	Journalistic	1	0	0	1	0	0	0	0	1	1	0	0	1	2	75
http://www.kingcounty.gov/healthservices/health/preparedness/pandemicflu/prevention.aspx	Government	1	0	0	1	0	0	0	0	1	0	1	1	1	3	76
https://www.vitamindcouncil.org/health-conditions/influenza/	No-profit	1	0	0	0	1	0	0	0	0	0	1	1	1	3	77
http://www.cdph.ca.gov/HEALTHINFO/DISCOND/Pages/H1N1Prevention.aspx	Government	1	0	0	1	0	0	0	0	0	0	0	1	0	1	78
http://www.staples.com/sbd/cre/marketing/centers/flu-center/	Other	1	0	0	1	0	0	0	0	0	0	0	0	0	0	79
http://www.vdh.virginia.gov/epidemiology/flu/vaccine.htm	Government	1	0	0	0	0	0	0	0	0	0	0	1	1	2	80
http://www.chatelaine.com/health/wellness/probiotics-to-prevent-colds/	Journalistic	0	0	1	1	1	1	0	0	0	1	0	0	1	2	81
http://www.mariasfarmcountrykitchen.com/the-7-best-natural-cold-and-flu-prevention-tips/	Commercial	1	0	1	1	1	1	1	0	0	1	0	0	1	2	82
http://www.floridahealth.gov/programs-and-services/prevention/flu-prevention/	Government	1	0	0	1	0	0	0	0	0	0	0	1	0	1	83
http://www.kdheks.gov/flu/download/PersonalStepsFlyer.pdf	Government	0	0	1	1	0	1	0	0	0	0	0	1	0	1	84
http://www.healthdirect.gov.au/colds-and-flu-prevention	Government	1	1	0	1	0	0	0	0	0	0	1	1	1	3	85
https://www.health.ny.gov/diseases/communicable/influenza/fact_sheet.htm	Government	1	1	1	1	0	1	0	0	0	0	0	1	1	2	86
http://chriskresser.com/how-to-prevent-colds-and-flus-naturally	Commercial	0	0	1	0	1	1	1	0	0	1	0	0	0	1	87
http://www.health24.com/Medical/Flu/Preventing-flu	Professional	1	0	1	1	1	1	0	0	0	0	0	0	1	1	89
http://aahealth.org/programs/comm-diseases/flu/tips	Government	1	0	1	1	0	1	0	0	1	0	0	1	1	2	90
http://www.tamiflu.com/	Commercial	0	1	0	0	0	0	0	0	0	0	0	0	0	0	91
http://www.khanacademy.org/science/health-and-medicine/respiratory-system-diseases/influenza/v/flu-vaccine-efficacy	Professional	1	0	0	1	0	0	0	0	0	1	0	1	0	2	92
http://www.cleveland.com/healthfit/index.ssf/2014/11/ksu_symposium_on_aging_fairhil.html	Journalistic	1	0	0	0	0	0	0	0	0	1	0	0	1	2	93
http://www.dailymail.co.uk/health/article-86521/Ten-ways-avoid-colds-flu-winter.html	Journalistic	0	0	1	1	1	1	1	0	0	1	0	0	0	1	94
http://www.uasys.edu/choosewell/prevent/flu.htm	Professional	1	0	0	0	0	0	0	0	0	0	0	1	0	1	95
http://www.norwood-hospital.org/dr-vasconcellos-preventing-cold-and-flu-video	Commercial	0	0	1	1	0	0	0	0	0	1	0	0	0	1	96
http://www.advisory.com/daily-briefing/blog/2013/11/how-to-avoid-the-flu-when-you-fly	Commercial	0	0	0	1	0	0	0	0	0	1	0	0	1	2	97
http://www.hsph.harvard.edu/news/features/face-masks-flu/	Professional	0	0	0	1	0	0	0	0	1	1	0	0	1	2	99
http://www.doctoroz.com/article/3-top-supplements-colds-and-flu	Commercial	0	0	0	0	1	0	1	0	0	1	0	0	1	2	100
http://www.scouting.org/Home/HealthandSafety/Alerts/2012_flu_prevention.aspx	Other	1	0	1	1	0	1	0	0	0	0	0	0	1	1	101
http://www.redcross.ca/crc/documents/handouts_pdtw_en.pdf	No-profit	1	0	0	1	0	0	0	0	0	1	0	1	1	3	103
http://pilladvised.com/2010/11/5-supplements-that-could-help-prevent-the-flu/	Commercial	0	0	0	0	1	0	1	0	0	1	1	0	1	3	104
http://www.forbes.com/2009/10/12/cold-flu-treatments-lifestyle-health-swine-flu-h1n1.html	Journalistic	1	0	1	1	0	1	0	0	0	1	0	0	1	2	105
http://www.nesh.com/articles-on-homeopathy/preventing-and-treating-the-flu-a-natural-medicine-perspective/	Commercial	0	0	1	1	1	1	1	0	0	1	0	0	1	2	106
https://patienteducation.osumc.edu/Documents/prevent-flu-goodhabits.pdf	Professional	1	0	1	1	0	1	0	0	0	0	0	1	1	2	107
http://www.thebarrieexaminer.com/2014/12/05/pellets-are-not-an-alternative--as-they-do-not-prevent-the-flu	Journalistic	1	0	0	0	0	0	0	0	0	1	0	0	1	2	108
http://www.lohud.com/story/sponsor-story/newyork-presbyterian-hospital/2014/10/13/newyork-prebyterian-hospital-cold-and-flu-prevention-tips-for-your-family/16977071/	Journalistic	1	0	1	1	0	1	0	0	0	1	0	0	1	2	109
http://www.denverbroncos.com/news-and-blogs/article-1/Flu-prevention-key-for-everyone/0c276e93-3be9-434e-9b5e-0f4f8ad8ea24	Journalistic	1	0	0	0	0	0	0	0	0	1	0	0	1	2	110
http://www.nbcnews.com/id/10894093/ns/health-cold_and_flu/t/working-out-may-help-prevent-colds-flu/	Journalistic	0	0	1	1	0	1	0	0	0	0	0	0	1	1	111
https://www.worldhealth.net/forum/thread/99358/vitamin-d-proven-more-effective-than-bo/?page=1	No-profit	0	0	0	0	1	0	0	0	0	1	0	0	1	2	112
http://www.flufacts.com/prevent/staying-healthy.jsp	Commercial	0	0	0	1	0	0	0	0	0	0	1	0	0	1	113
http://kidshealth.org/parent/infections/lung/flu.html	No-profit	1	0	0	1	0	0	0	0	0	1	0	0	1	2	114
http://www.womansday.com/health-fitness/fight-the-flu-food-102133	Journalistic	0	0	0	0	1	1	0	0	0	1	0	0	0	1	115
http://nutristart.com/preventing-flu-naturally/	Commercial	0	0	0	0	1	1	0	0	0	0	0	0	1	1	116
http://www.webmd.boots.com/cold-and-flu/flu-guide/flu-asthma	Portal	1	0	0	1	0	0	0	0	0	1	0	1	1	3	117
http://www.patienteducationcenter.org/articles/antiviral-medications-preventing-flu/	Professional	0	1	0	0	0	0	0	0	0	0	0	1	0	1	118
http://www.ucsfhealth.org/education/facts_about_the_flu/	Professional	1	1	0	1	0	0	0	0	0	0	0	1	0	1	119
http://www.wcvb.com/health/preventing-flu-during-holiday-travel/29953172	Journalistic	1	1	0	1	0	0	0	0	0	0	0	0	1	1	120
http://download.thelancet.com/flatcontentassets/H1N1-flu/prevention/prevention-10.pdf	Professional	1	1	0	0	0	0	0	0	0	1	1	1	1	4	121
http://sleepfoundation.org/sleep-news/sleep-may-be-best-prevention-cold-flu	No-profit	1	0	1	0	0	0	0	0	0	0	0	1	0	1	122
http://www.utmedicalcenter.org/news/370/5-ways-nutrition-can-prevent-cold-flu-and-treat-them/	Professional	1	0	1	1	1	1	0	0	0	0	0	1	1	2	123
http://www.brighamandwomensfaulkner.org/about-us/general-information/bwfh-news/Dont-Let-Cold-and-Flu-Get-You-Down.aspx	Professional	1	0	1	1	0	1	0	0	0	1	0	1	0	2	124
http://www.fda.gov/Drugs/DrugSafety/InformationbyDrugClass/ucm100228.htm	Government	1	1	0	0	0	0	0	0	0	0	0	1	1	2	125
http://www.chp.edu/CHP/Hand+Washing+to+Prevent+Flu	Professional	0	0	0	1	0	0	0	0	0	0	0	1	0	1	126
http://www.aafp.org/patient-care/immunizations/influenza.html	Professional	1	1	0	0	0	0	0	0	0	0	0	1	0	1	127
http://www.redcross.org/prepare/location/school/flu-prevention	No-profit	0	0	0	1	0	0	0	0	0	0	0	1	0	1	128
http://www.heartmdinstitute.com/video-library/web-shows/myth-buster-series/462-do-flu-shots-prevent-the-flu	Commercial	0	0	1	0	1	1	0	0	0	1	1	0	0	2	129
http://blog.uber.com/healthchicago	Commercial	1	0	0	0	0	0	0	0	0	1	0	0	1	2	130
http://news.ontario.ca/mohltc/en/2011/12/top-10-tips-to-avoid-catching-the-flu.html	Government	1	0	1	1	0	1	0	0	0	1	0	1	1	3	131
http://www.livestrong.com/article/378283-vitamins-to-prevent-the-flu/	No-profit	0	0	0	0	1	1	0	0	0	1	0	0	1	2	132
http://wellnessmama.com/1499/natural-remedies-for-illness/	Commercial	0	0	1	0	1	1	1	0	0	1	0	0	0	1	133
http://www.weather.com/health/cold-flu/news/how-stop-cold-flu-before-starts-20120330	Journalistic	0	0	1	1	1	1	1	0	0	0	0	0	1	1	134
http://www.primallyinspired.com/prevent-flu-naturally/	Commercial	0	0	0	0	0	0	0	1	1	1	0	0	0	1	135
http://www.kidsloveacupuncture.com/2013/02/05/flu-proof-your-kid-naturally/	Commercial	0	0	1	1	0	1	1	1	0	1	0	0	1	2	136
http://rockymountainhospitalforchildren.com/service/child-flu-prevention	Professional	1	0	0	1	0	0	0	0	0	0	0	1	0	1	137
http://www.hpb.gov.sg/HOPPortal/article?id=552	Government	1	1	1	1	0	1	0	0	1	0	0	1	1	2	138
http://summaries.cochrane.org/CD000364/AIRWAYS_vaccines-for-preventing-flu-in-people-with-asthma	Professional	1	0	0	0	0	0	0	0	0	1	1	1	1	4	139
http://drhyman.com/blog/2010/11/18/supporting-your-immune-system/	Commercial	1	0	1	0	1	1	1	0	1	1	0	0	1	2	140
http://www.slate.com/articles/news_and_politics/prescriptions/2010/02/how_to_sell_germ_warfare.html	Journalistic	1	0	0	1	0	0	0	0	0	1	0	0	1	2	141
http://www.express.co.uk/life-style/health/522304/How-to-beat-flu	Journalistic	1	0	0	1	1	1	0	0	0	1	0	0	1	2	143
http://www.gene.com/stories/preventing-flu-is-a-community-effort	Commercial	1	0	0	0	0	0	0	0	0	1	0	0	1	2	144
http://www.fruitsandveggiesmorematters.org/eating-fruits-and-vegetables-can-help-prevent-the-flu	No-profit	1	0	1	1	0	1	0	0	0	0	0	1	0	1	145
http://www.organicauthority.com/how-to-use-apple-cider-vinegar-to-prevent-and-treat-colds-and-the-flu/	Journalistic	0	0	0	0	0	1	0	0	0	1	0	0	1	2	147
http://www.immunize.nc.gov/PDFs/2012%20What%20Schools%20Need%20to%20Know%20About%20Preventing%20the%20Spread%20of%20the%20Flu%20FINAL.pdf	Government	1	0	0	1	0	0	0	0	0	0	0	1	0	1	148
http://umm.edu/health/medical/altmed/condition/influenza	Professional	1	1	1	1	1	1	1	0	0	1	1	1	1	4	149
http://health.usnews.com/health-news/blogs/eat-run/2013/12/12/6-natural-flu-fighting-remedies	Journalistic	0	0	0	0	1	1	1	0	0	1	0	0	1	2	150
http://www.institutefornaturalhealing.com/2013/10/5-natural-ways-to-avoid-the-flu/	Commercial	0	0	0	0	1	0	1	0	0	0	1	0	1	2	152
https://ca.news.yahoo.com/why-do-canadians-avoid-the-flu-shot-024415879.html	Journalistic	0	0	0	0	0	0	0	0	0	1	0	0	1	2	153
http://www.ncdnpe.org/documents/flu5.pdf	Other	1	0	0	1	0	0	0	0	0	0	0	0	0	0	154
http://www.crainscleveland.com/article/20141029/FREE/141029754/-focus-on-flu-campaign-aims-to-get-word-out-about	Journalistic	1	0	0	0	0	0	0	0	0	1	0	0	1	2	157
http://coldflu.about.com/od/WhenYouGettheFlu/f/Flu-Incubation-Period.htm	Journalistic	1	1	1	1	1	0	0	0	1	1	0	0	1	2	158
http://www.info.gov.hk/info/flu/eng/home.htm	Government	0	0	0	0	0	0	0	0	0	0	0	0	1	1	159
http://www.tuskegee.edu/academics/student_affairs/departments/student_health/tu_medical_bulletin_flu_influenza_alert.aspx	Professional	1	0	0	1	0	0	0	0	0	0	0	1	0	1	160
http://www.wholeliving.com/147359/what-eat-prevent-colds-and-flu	Journalistic	0	0	0	0	0	1	0	0	0	0	0	0	0	0	161
http://community.the-hospitalist.org/2013/01/18/making-clinicians-get-flu-shots-more-important-than-simply-preventing-the-flu/	Commercial	1	0	0	0	0	0	0	0	0	1	0	1	1	3	162
http://djournal.com/lifestyle/health-lines-preventing-flu/	Journalistic	1	0	0	1	0	0	0	0	0	1	0	0	1	2	163
http://www.halton.ca/cms/One.aspx?portalId=8310&pageId=82437	Government	1	0	0	1	0	0	0	0	0	0	0	1	0	1	164
http://www.globalhealingcenter.com/natural-health/onion-flu-remedy/	Commercial	0	0	0	0	0	1	0	0	0	1	1	0	1	3	165
http://www.fluandhealth.org/	Commercial	1	0	0	1	0	0	0	0	0	0	0	0	0	0	166
http://www.hopemacau.com/index.php/en/patient-education/64-preventing-influenza-flu	Professional	1	1	0	0	0	0	0	0	0	0	0	0	0	0	167
http://www.cbn.com/health/weightloss/prevent_flu_galland.aspx	Journalistic	0	0	0	0	1	0	1	0	0	1	1	0	0	2	168
https://www.qld.gov.au/health/conditions/alerts/seasonal-flu/prevention/index.html	Government	1	0	0	1	0	0	0	0	0	0	0	1	1	2	169
http://bodyequilibriumofcharlottesville.com/?tag=preventing-flu	Commercial	0	0	0	1	0	0	0	0	0	1	0	0	0	1	170
http://nativenewsnetwork.posthaven.com/preventing-flu	Other	1	0	0	1	0	0	0	0	0	1	0	0	1	2	171
http://www.ketv.com/preventing-flu-during-pregnancy-may-lower-risk-of-autism/22562426	Journalistic	1	0	0	0	0	0	0	0	0	1	0	0	1	2	172
http://www.greatfallstribune.com/story/news/local/2014/09/22/red-cross-montana-preventing-flu-illnesses/16033621/	Journalistic	0	0	0	1	0	0	0	0	0	1	0	0	1	2	173
http://www.cidrap.umn.edu/news-perspective/2014/12/cdcs-flu-warning-raises-questions-about-vaccine-match	Journalistic	1	1	0	0	0	0	0	0	0	1	1	0	1	3	174
http://www.khou.com/story/news/health/2014/12/07/flu-season-could-be-rough-this-year/20068081/	Journalistic	1	1	0	0	0	0	0	0	0	1	0	0	1	2	175
http://m.news24.com/health24/Medical/Flu/Preventing-flu	Journalistic	1	0	0	1	1	1	0	0	0	0	0	0	1	1	177
http://www.imdb.com/title/tt1241883/	Other	0	0	0	0	0	0	0	0	0	1	0	0	0	1	179
http://www.wellpath.net/2014/08/preventing-flu-in-children/	Professional	0	0	1	1	1	1	0	0	0	1	0	0	1	2	180
http://uvahealth.com/about/news-room/videos/preventing-flu-through-handwashing	Professional	0	0	0	1	0	0	0	0	0	1	0	0	1	2	182
http://personalliberty.com/cdc-flu-vaccination-numbers-games/	Other	0	0	0	0	0	0	0	0	0	1	0	0	1	2	183
http://blog.ups.com/2013/11/14/preventing-flu-when-we-flew/	Other	1	0	0	0	0	0	0	0	0	1	0	0	1	2	184
http://blogs.einstein.yu.edu/preventing-flu/	Professional	1	0	0	0	0	0	0	0	0	1	0	0	1	2	185
http://www.pharmaceutical-journal.com/news-and-analysis/news/zanamivir-as-effective-as-oseltamivir-at-preventing-flu-symptoms/10974024.article	Professional	0	0	0	0	0	0	0	0	0	1	1	1	1	4	186
http://www.grosvenorcontracts.com/preventing-flu-scientists-find-bacteria-in-japanese-pickled-turnips-which-could-boost-immune-system/	Commercial	0	0	0	0	0	1	0	0	0	0	0	1	1	2	187
http://www.huffingtonpost.ca/news/preventing-flu/	Journalistic	0	0	0	1	0	1	0	0	0	1	0	0	1	2	188
http://www.surehire.ca/blog/labels/preventing-flu/	Commercial	0	0	0	1	0	0	0	0	1	0	0	0	1	1	189
http://blog.forefrontmag.com/2013/11/preventing-flu-and-bad-behavior-bugs/	Journalistic	1	0	0	0	0	0	0	0	0	1	0	0	1	2	190
http://enlightenme.com/top-10-steps-to-preventing-flu/	Other	1	0	1	1	1	1	0	0	0	0	0	0	0	0	191
http://www.cattco.org/preventive/preventing-flu-and-other-illnesses	Government	0	0	1	1	0	1	0	0	0	0	0	1	1	2	192
http://www.ladderingworks.com/preventing-flu-and-bad-behavior-bugs/	Other	1	0	0	0	0	0	0	0	0	1	0	0	1	2	193
http://www.citizen-times.com/story/life/2014/12/08/medical-column-factual-reasons-get-flu-vaccine/20111075/	Journalistic	1	0	0	0	0	0	0	0	0	1	0	0	1	2	194
http://placercountyonline.com/2014/preventing-cold-flu-holiday-season/	Journalistic	1	0	1	1	0	0	0	0	0	1	0	0	1	2	195
http://seattletimes.com/html/localnews/2025183237_flumistxml.html	Journalistic	1	1	0	0	0	0	0	0	0	1	0	0	1	2	196
http://wholehealthchicago.com/1680/preventing-flu/	Commercial	0	0	0	0	0	1	0	0	0	0	0	0	1	1	197
http://www.northlandsnewscenter.com/news/local/Natl-Flu-Vaccination-Week--285034661.html	Journalistic	1	0	0	0	0	0	0	0	0	1	0	0	1	2	198
http://www.learn.edu/pages/news/entry/natural-remedies-for-preventing-flu.html	Professional	0	0	1	1	0	1	1	0	1	1	0	1	1	3	199
https://themindbodyshift.wordpress.com/2014/10/15/nick-cannon-talks-on-thriving-with-lupus-nephritis-and-preventing-flu-with-theraflu/	Commercial	1	0	0	0	0	0	0	0	0	1	0	0	1	2	200

## Sheet: prevention-IT
Website	Category	Flu Jab	App Drug	Lifestyle	Hygiene	Supplements	Nutrition	CAM Herbs	CAM Practices	Devices	Authorship	Attribution	Disclosure	Currency	Total JAMA	position	webcite
http://www.ok-salute.it/diagnosi-e-cure/11_g_influenza-evitare.shtml	journalism	0	0	1	1	0	1	0	0	0	0	0	1	0	1	1	http://www.webcitation.org/6Z9Wyehdg
http://www.salute.gov.it/portale/news/p3_2_1_1_1.jsp?menu=notizie&p=dalministero&id=1725	government	1	0	0	1	0	0	0	0	0	1	0	1	1	3	2	http://www.webcitation.org/6Z9XP8RTi
http://www.guna.it/prevenzione-invernale	commercial	0	0	0	1	0	0	0	1	0	0	0	1	0	1	3	http://www.webcitation.org/6Z9XJAxUH
http://www.valdelsa.net/det-cy24-it-EUR-42201-.htm	journalism	0	0	0	1	0	1	1	0	0	0	0	1	0	1	4	http://www.webcitation.org/6Z9XZWnsN
http://www.osservatorioinfluenza.it/linfluenza/prevenire-e-curare-linfluenza	portal	1	0	0	1	0	0	0	0	0	0	0	0	0	0	5	http://www.webcitation.org/6Z9Xd3kZm
http://www.lucaavoledo.it/2011/10/prevenzione-naturale-di-influenza.html	commercial	0	0	1	0	1	1	1	0	0	1	0	1	1	3	6	http://www.webcitation.org/6Z9Xgb9Mr
http://www.campagnainfluenza.it/	government	1	0	0	1	0	0	0	0	0	0	0	1	0	1	7	http://www.webcitation.org/6Z9ZIKzUq
http://www.ordinefarmacistita.it/informasalute/153-prevenzione-e-controllo-dell-influenza.html	professional	1	0	0	1	0	0	0	0	0	0	0	1	0	1	8	http://www.webcitation.org/6Z9a4bkRb
http://www.vicks.it/saperne-di-piu/articoli-prevenzione/articoli/raffreddore-influenza-bambini/	commercial	0	0	1	1	0	0	0	0	1	0	0	1	0	1	9	http://www.webcitation.org/6Z9a82VFi
http://www.pharmamedix.com/patologiavoce.php?pat=Influenza&vo=Prevenzione	portal	1	0	0	1	0	0	0	0	0	1	0	1	0	2	10	http://www.webcitation.org/6Z9aCntbx
http://www.meteoweb.eu/2014/12/nfluenza-20142015-cause-sintomi-cura-vaccino-antinfluenzale-prevenzione/364236/	journalism	1	0	0	1	0	0	0	0	0	1	0	1	1	3	11	http://www.webcitation.org/6Z9aFT2eS
http://www.greenme.it/vivere/salute-e-benessere/15186-prevenzione-influenza-raffreddore-piante	journalism	0	0	0	0	1	0	1	0	0	0	0	0	0	0	12	not archivable
http://scienzaesalute.blogosfere.it/post/533480/influenza-2014-le-donne-piu-previdenti-ecco-come-prevenirla	journalism	1	0	1	1	1	1	0	0	0	1	0	1	1	3	13	http://www.webcitation.org/6Z9aLPrq1
http://www.corriere.it/salute/13_febbraio_08/influenza-vero-falso_d6a40048-71e1-11e2-8d40-790077d2d105.shtml	journalism	0	0	0	1	0	0	0	0	0	0	0	1	1	2	14	http://www.webcitation.org/6Z9d64TQD
http://www.donnamoderna.com/mamme/bambini-1-3-anni/prevenire-influenza-bambini-con-omeopatia	journalism	0	0	0	1	0	1	0	1	0	1	0	1	0	2	15	http://www.webcitation.org/6Z9dFaVBA
http://www.tuttogreen.it/come-prevenire-influenza/	portal	0	0	1	1	0	1	0	0	0	0	0	1	1	2	16	http://www.webcitation.org/6Z9dM9kUb
http://it.blastingnews.com/salute/2014/10/influenza-stagionale-2014-in-arrivo-sintomi-prevenzione-e-rimedi-00140979.html	other	1	0	1	1	0	0	0	0	0	0	0	1	1	2	18	http://www.webcitation.org/6Z9fCOEEn
http://www.nonfartiinfluenzare.it/cont/non-farti-influenzare-le-ricette-per-influenza/914/ricette-della-prevenzione-influenza.asp	portal	0	0	0	0	0	1	0	0	0	0	0	1	0	1	19	not archivable
http://www.my-personaltrainer.it/salute/influenza.html	portal	1	0	1	1	0	1	0	0	0	0	0	0	0	0	20	http://www.webcitation.org/6Z9fJXu1C
http://www.nostrofiglio.it/bambino/bambino-1-3-anni/salute/influenza-2014-2015-nei-bambini-sintomi-prevenzione-vaccino	portal	1	0	0	1	0	0	0	0	0	1	0	1	1	3	21	http://www.webcitation.org/6Z9utNbJN
http://www.quotidianosicurezza.it/approfondimenti/e-utile-sapere-che/circolare-prevenzione-influenza-2014.htm	professional	1	0	0	1	0	0	0	0	0	1	1	1	1	4	22	http://www.webcitation.org/6Z9uweI4W
http://www.comune.torino.it/protezionecivile/pdf/Ministero_della_salute.pdf	government	1	0	0	1	0	0	0	0	0	1	0	1	1	3	23
http://www.adiconsum.it/files/guide_tematiche/Prevenzione-Influenza.pdf	no profit	1	0	1	1	0	1	0	0	0	0	0	1	0	1	24
http://www.intrage.it/SaluteEPrevenzione/prevenzione_influenza	portal	1	1	0	1	0	0	0	0	0	0	0	1	1	2	25
http://www.agenziafarmaco.gov.it/it/content/prevenzione-dell%E2%80%99influenza-l%E2%80%99importanza-della-vaccinazione	government	1	0	0	0	0	0	0	0	0	0	0	1	1	2	26
http://www.dilei.it/36797/benessere/foto/influenza-prevenzione-cura.html	portal	1	0	1	0	0	0	0	0	0	0	0	1	1	2	28
http://www.vanityfair.it/benessere/dieta-e-alimentazione/14/11/26/10-alimenti-anti-influenza	journalism	0	0	0	0	0	1	0	0	0	1	0	1	1	3	30
http://www.bachecaliceopalmieri.eu/prevenzione-influenza/	other	1	1	1	1	0	0	0	0	0	0	1	1	0	2	31
http://www.iobenessere.it/influenza/	other	0	0	1	0	0	1	0	0	0	1	0	0	0	1	32
http://www.tantasalute.it/articolo/la-dieta-per-prevenire-e-combattere-l-influenza/43155/	journalism	0	0	0	0	0	1	0	0	0	0	0	1	0	1	33
http://www.epicentro.iss.it/problemi/influenza/influenza.asp	government	1	0	0	0	0	0	0	0	0	0	1	0	1	2	35
https://www.wellme.it/benessere/laltra-medicina/295-influenza-la-prevenzione-e-in-erboristeria	other	0	0	0	0	0	1	1	0	0	1	0	1	0	2	36
http://www.istruzione.lombardia.gov.it/protlo_17173_09_ottobre_2014/	government	1	0	0	1	0	0	0	0	0	1	1	1	1	4	37
http://www.lastampa.it/2015/03/01/edizioni/biella/influenza-snobbata-la-prevenzione-duemila-vaccinati-in-meno-nel-biellese-KC3JYREjw3WP0dg8iQcsoI/pagina.html	journalism	1	0	0	0	0	0	0	0	0	1	0	1	1	3	38
http://www.benessere.com/salute/disturbi/influenza.htm	commercial	1	1	0	0	0	0	0	0	0	1	0	1	0	2	39
http://www.ausl.mo.it/flex/cm/pages/ServeBLOB.php/L/IT/IDPagina/4569	government	0	0	0	1	0	0	0	0	0	0	0	1	1	2	40
http://www.istruzioneveneto.it/wpusr/archives/30461	government	1	0	0	0	0	0	0	0	0	1	1	1	1	4	41
http://www.forexinfo.it/Influenza-2015-arriva-la-svizzera	journalism	1	0	0	0	1	0	0	0	0	1	0	1	1	3	42
http://www.icviareginaelena.gov.it/prevenzione-influenza-raccomandazioni-per-la-stagione-2014-2015/	government	1	0	0	1	0	0	0	0	0	1	1	1	1	4	45
http://www.aslcarbonia.it/index.php?xsl=15&s=7&v=9&c=3067&esn=Primo+piano&na=1&n=10	government	1	0	0	1	0	0	0	0	0	0	0	1	1	2	48
http://www.pianetamamma.it/il-bambino/malattie/prevenire-e-curare-l-influenza-con-l-omeopatia.html	other	0	0	0	1	1	1	1	1	0	1	0	1	1	3	49
http://www.usrlazio.it/index.php?s=1052&wid=2082	government	1	0	0	0	0	0	0	0	0	0	0	0	0	0	51
http://www.iiscostanzavarano.it/studenti/comunicazioni-studenti-famiglie/196-circolare-del-ministero-della-salute-sulla-prevenzione-e-controllo-dell-influenza.html	government	1	0	0	1	0	0	0	0	0	1	1	1	1	4	52
http://www.sanita.regione.lombardia.it/cs/Satellite?c=Redazionale_P&childpagename=DG_Sanita%2FDetail&cid=1213370431966&pagename=DG_SANWrapper	government	1	0	0	1	0	0	0	0	0	0	1	1	1	3	53
http://www.saperesalute.it/network/malanni-invernali/influenza/una-casa-a-prova-di-influenza	commercial	0	1	0	1	0	0	0	0	0	1	0	1	0	2	54
http://www.comune.brembio.lo.it/index.php?option=com_content&view=article&id=704:campagna-per-la-prevenzione-dellinfluenza&catid=47:comunicazioni-utili-generiche&Itemid=79	government	1	0	0	0	0	0	0	0	0	0	0	1	0	1	55
http://archivio.panorama.it/scienza/salute/prevenzione/Per-prevenire-influenza-e-raffreddore-forse-la-vitamina-giusta-e-la-D	journalism	0	0	0	0	1	1	0	0	0	1	0	1	0	2	56
https://it-it.facebook.com/pages/Influenza-A-H1N1-la-prevenzione-%C3%A8-nelle-tue-mani/154162557892	other	1	0	0	0	0	0	0	0	0	0	0	0	0	0	57
http://www.repubblica.it/salute/prevenzione/2014/11/10/news/influenza_i_primi_casi_epidemia_lieve_profilassi_al_via_per_i_pi_fragili-100201034/	journalism	1	0	0	0	0	0	0	0	0	1	0	1	1	3	58
http://www.investireoggi.it/attualita/influenza-il-picco-arriva-a-gennaio-sintomi-e-prevenzione/	journalism	0	0	1	1	0	1	0	0	0	1	0	0	1	2	59
http://yourself.pianetadonna.it/yourpedia/malattie-infettive/influenza/	portal	1	0	0	1	0	0	0	0	0	0	0	0	0	0	60
http://www.icportomantovano.gov.it/prevenzione-influenza	government	0	0	0	1	0	0	0	0	0	1	0	1	1	3	63
http://www.legnanonews.com/news/9/42191/	journalism	1	0	0	0	0	0	0	0	0	0	0	1	1	2	64
http://www.youtube.com/watch?v=VMbxiy2N4pw	government	1	0	0	1	0	0	0	0	0	1	0	1	1	3	65
http://www.icsantasofia.gov.it/pagina.asp?id=28	government	1	0	0	1	0	0	0	0	0	1	1	1	1	4	66
http://www.liceovarronecassino.it/web/index.php?option=com_content&view=article&id=246:prevenzione-e-controllo-dellinfluenza	government	1	0	0	1	0	0	0	0	0	1	1	1	1	4	67
http://www.emmediellesrl.it/prevenzione-dellinfluenza-prima-regola-lavarsi-bene-le-mani/	commercial	0	0	0	1	0	0	0	0	0	0	0	1	0	1	69
http://www.icgalatonepolo2.gov.it/index.php?option=com_content&view=article&id=48:circolare-prevenzione-influenza-2&catid=62&Itemid=217	government	1	0	0	1	0	0	0	0	0	1	1	1	1	4	70
http://prevenzione.ulss20.verona.it/influenza_vaccinazione.html	government	1	0	0	1	0	0	0	0	0	1	0	1	1	3	73
http://www.comune.legnago.vr.it/ente/il-comune-informa/prevenzione-e-controllo-dellinfluenza-raccomandazioni-per-la-stagione-20142015/2385.html	government	1	0	0	1	0	0	0	0	0	1	1	1	1	4	74
http://151.1.149.50/prevenzione-e-controllo-dellinfluenza	government	1	0	0	0	0	0	0	0	0	1	0	1	1	3	75
http://it.wikipedia.org/wiki/Influenzavirus_A_sottotipo_H1N1	portal	1	0	0	1	0	0	0	0	0	1	1	1	1	4	76
http://www.governo.it/GovernoInforma/campagne_comunicazione/influenza2013/index.html	government	1	0	0	1	0	0	0	0	0	g	0	1	1	2	77
http://istitutocomprensivopescara2.gov.it/index.php/tutte-le-circolari/125-prevenzione-e-controllo-dell-influenza-anno	government	1	0	0	1	0	0	0	0	0	1	1	1	1	4	78
http://www.associazionedonatorisangueleselve.it/index.php/news/53-prevenzione-dall-influenza	no profit	0	0	0	1	0	0	0	0	0	0	0	1	0	1	80
http://www.abcsalute.it/blog/influenza-americana-inverno-2014-cose-e-come-curarla/	portal	1	0	0	1	0	0	0	0	0	1	0	1	1	3	81
http://www.piuchepuoi.it/omeopatia/la-terapia-omeopatica-per-prevenire-linfluenza/	commercial	0	0	0	0	0	0	1	0	0	1	1	1	1	4	82
http://www.eurosalus.com/malattie/malattia/influenza	commercial	0	0	1	1	0	1	0	0	0	1	0	0	0	1	84
http://www.comprensivogrottammare.it/news/552-prevenzione-influenza.html	government	1	1	0	1	0	0	0	0	0	1	1	1	1	4	85
http://www.icinveruno.it/node/891	government	1	0	0	1	0	0	0	0	0	1	1	1	1	4	86
http://www.icviasanbiagioplatani.gov.it/notizie-utili/273-prevenzione-e-controllo-dell-influenza-ministero-della-salute	government	1	0	0	1	0	0	0	0	0	1	1	1	1	4	87
http://www.casalfiumanese.provincia.bologna.it/?q=node/202	government	1	0	0	1	0	0	0	0	0	1	1	1	1	4	88
http://www.altrasalute.it/articoli_000010.html	commercial	0	0	0	0	0	0	1	0	0	0	0	1	0	1	89
http://scuolamediacapoterra.it/index.php/notizie-2/288-prevenzione-e-controllo-dell-influenza-2014-2015	government	1	0	0	1	0	0	0	0	0	1	1	1	1	4	90
http://www.itsbianchini.gov.it/2-non-categorizzato/95-prevenzione-influenza.html	government	1	0	0	1	0	0	0	0	0	1	1	1	1	4	91
http://www.comune.sangennarovesuviano.na.it/index.php?option=com_content&view=article&id=611:ministero-della-salute-prevenzione-e-controllo-dell-influenza-raccomandazioni-stagione-20142015&catid=76:news&Itemid=135	government	1	0	0	1	0	0	0	0	0	1	1	1	1	4	92
http://www.istruzionepiemonte.it/?p=11673	government	1	0	0	1	0	0	0	0	0	1	1	1	1	4	93
http://www.comprensivo.belludi.it/index.php?option=com_content&view=article&id=195:prevenzione-e-controllo-dell-influenza	government	1	0	0	1	0	0	0	0	0	1	1	1	1	4	94
http://www.farmanaturashop.it/it/omeopatia/guna-omeogriphi-prevenzione-cura-influenza	commercial	0	0	0	0	0	0	1	0	0	0	0	1	0	1	95
http://www.driatec.it/joomla/index.php?option=com_content&view=article&id=158:prevenzione-invernale-influenza&catid=1:news&Itemid=120	commercial	0	0	0	0	1	0	1	0	0	0	0	1	0	1	97
http://ww3.istruzioneer.it/2014/10/09/prevenzione-e-controllo-dellinfluenza-raccomandazioni-del-ministero-della-salute-per-la-stagione-20142015/	government	1	0	0	1	0	0	0	0	0	1	1	1	1	4	98
http://www.icspinazzola.gov.it/index.php?option=com_content&view=article&id=22:prevenzione-e-controllo-dell-influenza-2014-2015&catid=7&Itemid=109	government	1	0	0	1	0	0	0	0	0	1	1	1	1	4	99
http://www.icviacassia1694roma.gov.it/prevenzione-influenza-2014-15/	government	1	0	0	1	0	0	0	0	0	1	1	1	1	4	100
http://www.iccatalanomoscati.it/index.php?option=com_content&view=article&id=239:prevenzione-e-controllo-dell-influenza-per-la-stagione-2014-15&catid=37:comunicazioni&Itemid=104	government	1	0	0	1	0	0	0	0	0	1	1	1	1	4	102
http://www.icpallagorio.it/circolari/141-prevenzione-e-controllo-dell-influenza-2014-2015.html	government	1	0	0	1	0	0	0	0	0	1	1	1	1	4	103
http://www.iccave.gov.it/prevenzione-e-controllo-influenza-raccomandazioni-per-la-stagione-201415/	government	1	0	0	1	0	0	0	0	0	1	1	1	1	4	104
http://www.ulss4.veneto.it/web/ulss4/Prevenzione/influ	government	1	0	0	1	0	0	0	0	0	0	0	0	0	0	105
http://www.tecnogranda.it/site/dettaglio.php?id_noticia=170	commercial	0	0	1	1	0	1	0	0	0	0	0	0	0	0	106
http://www.comunepalmacampania.it/index.php?option=com_content&view=article&id=342:prevenzione-e-controllo-dell-influenza-2014-2015&catid=2&Itemid=101	government	1	0	0	1	0	0	0	0	0	1	1	1	1	4	107
http://icgiacich.goiss.it/home/gestione-corrente/attivita-a-s-2010-2011/prevenzionedellinfluenza-raccomandazioniperlastagione2014-15	government	0	0	0	1	0	0	0	0	0	1	0	0	1	2	108
http://www.augustoscocchera.it/scuola/area-genitori/avvisi-genitori/prevenzione-e-controllo-dell-influenza.php	government	1	0	0	1	0	0	0	0	0	1	1	1	1	4	109
http://www.regione.lazio.it/rl_sanita/?vw=contenutidettaglio&id=234	government	1	0	0	0	0	0	0	0	0	0	0	0	0	0	110
http://www.riza.it/figli-felici/salute/2206/previeni-l-influenza-dei-bambini-con-le-cure-naturali.html	portal	0	0	0	1	1	1	0	1	0	0	0	1	0	1	111
http://www.liceofiore.it/index.php?option=com_content&view=article&id=406:nota-miur-prevenzione-e-controllo-dellinfluenza-2014-2015&catid=1:ultime&Itemid=70	government	1	0	0	1	0	0	0	0	0	1	1	1	1	4	113
http://www.puntosicuro.it/sicurezza-sul-lavoro-C-1/tipologie-di-rischio-C-5/rischi-da-agenti-biologici-C-52/prevenzione-dell-influenza.-prima-regola-lavarsi-bene-le-mani-AR-14244/	journalism	1	0	0	1	0	0	0	0	0	1	1	1	1	4	114
http://www.omnicomprensivoguardiagrele.gov.it/omni/news2/557-prevenzione-e-controllo-influenza-raccomandazioni-stagione-2014-15.html	government	1	0	0	1	0	0	0	0	0	1	1	1	1	4	115
http://www.liceopietrobono.it/articolo/circolare-prevenzione-influenza	government	1	0	0	1	0	0	0	0	0	1	1	1	1	4	116
http://www.famigliaesalute.com/curare-prevenire-linfluenza-gli-alimenti/	portal	0	0	0	0	0	1	0	0	0	0	0	0	0	0	119
http://altoadige.gelocal.it/bolzano/cronaca/2014/10/27/news/prevenzione-da-oggi-il-vaccino-contro-l-influenza-1.10197404	journalism	1	0	0	0	0	0	0	0	0	0	0	0	1	1	120
https://istitutoviadellecarine.gov.it/2014/10/prevenzione-influenza/	government	1	0	0	1	0	0	0	0	0	1	1	1	1	4	122
http://www.comuneagira.gov.it/amministrazione-trasparente/interventi-straordinari-e-di-emergenza/170-prevenzione-e-controllo-dell-influenza-stagione-2014-2015.html	government	1	0	0	1	0	0	0	0	0	1	1	1	1	4	124
http://www.benessereblog.it/post/118212/influenza-e-raffreddore-prevenire-le-malattie-stagionali-con-lomeopatia	other	0	0	1	1	0	0	1	0	0	1	1	0	1	3	125
http://www.bambinopoli.it/eta-scolare/come-prevenire-linfluenza-senza-farmaci/2559/	other	0	0	1	1	0	0	0	0	0	0	0	1	0	1	126
http://www.pubblicaamministrazione.net/connettivita/articoli/3980/influenza-prevenzione-e-vaccinazioni-la-guida.html	journalism	1	0	0	1	0	0	0	0	0	1	1	1	1	4	127
http://www.ic2arzignano.it/prevenzione-influenza-stagione-2014-2015/	government	1	0	0	1	0	0	0	0	0	1	1	1	1	4	128
http://www.icbellante.gov.it/tag/influenza-prevenzione-malattie/	government	1	0	0	1	0	0	0	0	0	1	1	1	1	4	129
http://www.smsvian.it/joomla/genitori/57-controllo-dell-influenza	government	1	0	0	1	0	0	0	0	0	1	1	1	1	4	130
http://www.oggi.it/benessere/diete/2014/02/05/influenza-la-prevenzione-e-bio/	journalism	0	0	0	0	0	1	0	0	0	0	1	1	1	3	131
http://www.giuseppegreggiati.gov.it/j/index.php?option=com_content&view=article&id=543:comunicazione-n195-del-26012015-prevenzione-e-controllo-dellinfluenza-per-la-stagione-20142015&catid=1:ultime&Itemid=103	government	0	0	0	1	0	0	0	0	0	0	1	1	1	3	132
http://www.lafamigliasulweb.com/ICLATIANO/index.php/circolari/149-nota-miur-prevenzione-e-controllo-influenza.html	government	1	0	0	1	0	0	0	0	0	1	1	1	1	4	133
http://comprensivotorracamatera.gov.it/sito/blog/2014/10/12/circ-19-prevenzione-influenza/	government	1	0	0	1	0	0	0	0	0	1	1	1	1	4	134
http://salute.pourfemme.it/articolo/oscillococcinum-il-vaccino-omeopatico-per-prevenire-e-curare-l-influenza/19217/	other	0	0	0	0	0	0	1	0	0	0	0	1	0	1	135
http://www.periodofertile.it/gravidanza/9-suggerimenti-per-evitare-linfluenza-gravidanza-e-non-solo	other	1	0	1	1	1	1	0	0	0	0	1	1	0	2	136
http://www.comune.nola.na.it/index.php?option=com_content&view=article&id=2349:prevenzione-dinfluenza-stagionale&catid=73:ecologia-e-ambiente&Itemid=248	government	1	0	0	1	0	0	0	0	0	1	1	1	1	4	138
http://www.anma.it/news-anma/prevenzione-e-controllo-dellinfluenza-raccomandazioni-per-la-stagione-2014-2015/	government	1	0	0	1	0	0	0	0	0	1	1	1	1	4	139
http://www.primolevimarino.it/wp/prevenzione-e-controllo-dellinfluenza/	government	1	0	0	1	0	0	0	0	0	1	1	1	1	4	140
http://www.benesserevillage.it/htm/influenzastagionale.html	other	1	1	1	0	1	1	0	0	0	1	0	1	1	3	141
http://www.ecoblog.it/post/45607/prevenire-linfluenza-e-combattere-linquinamento-con-10-cibi	other	0	0	0	0	0	1	0	0	0	1	1	1	1	4	142
http://www.antiagingclub.it/Medicina/PREVENIRE-LINFLUENZA!.html?RwPag=true&pagina_ID=1083	commercial	1	0	1	1	1	1	0	0	0	0	0	0	0	0	143
http://www.liceomanara.it/prevenzione-e-controllo-dellinfluenza-raccomandazione-la-stagione-2014-15	government	1	0	0	1	0	0	0	0	0	1	1	1	1	4	144
http://www.staibene.it/salute/influenza/	journalism	1	0	0	1	0	0	0	0	0	0	0	1	0	1	146
http://www.salutenaturale.eu/news/influenza/influenza-prevenire-e-meglio-che-curare.html	commercial	0	0	0	0	0	0	1	0	0	0	0	1	0	1	147
http://www.corrieredicomo.it/flop-nella-prevenzione-picco-di-casi-di-influenza-sul-lario/	journalism	1	0	0	0	0	0	0	0	0	0	0	1	1	2	148
http://www.teleserenita.com/informazioni/notizie-teleserenita-famiglie/item/255-anziani-influenza-prevenzione.html	commercial	1	0	1	1	0	1	0	0	0	0	0	1	0	1	150
http://www.lineaamica.gov.it/notizie/prevenzione-dellinfluenza-raccomandazioni-ministero-salute	government	1	0	0	1	0	0	0	0	0	1	1	1	1	4	153
http://www.sapere.it/sapere/pillole-di-sapere/salute-e-benessere/influenza-sintomi-prevenzione-cura.html	journalism	1	0	1	1	0	1	0	0	0	0	0	1	1	2	154
http://www.vitamineproteine.com/2013/02/04/come-prevenire-linfluenza/	other	0	0	1	1	1	0	0	0	0	1	0	1	1	3	155
http://www.icudine.it/area-informativa/comunicazioni/prevenzione-e-controllo-dell2019influenza-raccomandazioni-per-la-stagione-2014-2015	government	1	0	0	1	0	0	0	0	0	1	1	1	1	4	156
http://www.comune.giovinazzo.ba.it/assessorati/solidarieta-sociale-sanita-pubblica-istruzione-legalita-trasparenza-sport/home-assessorato-solidarieta-sociale/903-prevenzione-dell-influenza.html	government	1	0	0	1	0	0	0	0	0	1	1	1	1	4	157
http://www.mybestlife.com/ita_salute/incasodi/mesi_freddi1.htm	other	1	0	0	0	0	0	1	0	0	1	0	1	0	2	159
http://www.naturopataonline.org/medicina-alternativa/cure-naturali/85-prevenire-l-influenza-integratori-e-fitoterapia-di-supporto-per-il-sistema-immunitario-2.html	other	0	0	0	0	1	0	1	0	0	1	0	0	0	1	160
http://www.spaziosalutesandecenzio.it/news/prevenire-l-influenza-con-l-omeopatia/	professional	1	0	0	0	1	0	1	0	0	1	0	0	0	1	161
http://www.comune.sannicolodarcidano.or.it/modules.php?modulo=mkNews&idcontent=5799	government	1	0	0	1	0	0	0	0	0	1	1	1	1	4	162
http://www.deabyday.tv/salute-e-benessere/prevenzione/guide/4751/Come-evitare-di-ammalarsi-con-le-strategie-anti-influenza.html	journalism	0	0	1	1	1	1	0	0	0	1	0	1	0	2	165
http://www.blogdelbenessere.it/post/424/le-regole-per-prevenire-e-combattere-l-influenza.html	other	0	0	1	1	1	1	0	0	0	1	0	1	0	2	166
http://www.malattievirali.it/letteratura-scientifica/rimedi-fitoterapici/item/154-fitoterapia-prevenzione-influenza-e-gestione-sindrome-influenzale	journalism	1	0	0	0	1	0	1	0	0	1	1	1	1	4	167
http://www.dica33.it/cont/focus/1109/2100/influenza-prevenzione-medicine-alternative.asp	journalism	1	0	0	0	1	0	1	0	0	1	0	0	1	2	168
http://www.progettoasco.it/riviste/rivista_simg/2008/04_2008/7.pdf	professional	1	0	0	0	0	0	0	0	0	1	1	1	1	4	169
http://stefanobarra.com/2014/11/22/osteopatia-influenza/	professional	0	0	0	0	0	0	0	1	0	1	0	0	1	2	170
http://www.comune.santantimo.na.it/archivio2_notizie-e-comunicati_0_259_15_1.html	government	1	0	0	1	0	0	0	0	0	1	1	1	1	4	171
http://www.asplazio.it/perilcittadino/ah1n1v/ah1n1_01.php	government	1	0	0	1	0	0	0	0	0	1	1	1	1	4	172
http://www.dailymotion.com/video/x1atgjl_campagna-di-comunicazione-sulla-prevenzione-dell-influenza-stagionale_news	government	1	0	0	1	0	0	0	0	0	1	0	1	1	3	173
http://www.sardellaconsulenze.it/banca-dati.asp?id_bancadati=39	commercial	1	0	0	1	0	0	0	0	0	0	1	1	0	2	174
http://www.medicinalive.com/medicina-tradizionale/virologia/influenza-prevenzione-spot-ricky-tognazzi-video/	other	1	0	0	1	0	0	0	0	0	1	0	1	1	3	175
http://www.cibo360.it/cibo_salute/altrepatologie/influenza.htm	commercial	1	0	0	0	0	0	0	0	0	0	0	1	0	1	176
http://www.miglioriamoci.net/prevenire-influenza/	commercial	0	0	0	0	1	0	1	0	0	1	0	1	1	3	178
http://www.farmaebenessere.it/in-the-news/influenza-stagionale-vaccino-ed-utili-consigli-del-farmacista/prevenire-influenza-vaccinazione-annuale	no profit	1	0	0	0	0	0	0	0	0	1	0	1	1	3	179
https://www.fondazioneveronesi.it/articoli/altre-news/influenza-il-decalogo-della-prevenzione	no profit	0	0	1	1	0	1	0	0	0	0	0	1	1	2	180
http://www.infiltrato.it/costume-societa/influenza-2015-sintomi-come-sara-rimedi-naturali-cura-e-prevenzione	journalism	0	0	0	1	1	1	0	0	0	0	0	1	1	2	181
http://www.salaconsilina.gov.it/prevenzione-e-controllo-dellinfluenza-raccomandazioni-per-la-stagione-20142015/	government	1	0	0	1	0	0	0	0	0	1	1	1	1	4	182
http://www.comune.ripesanginesio.mc.it/avvisi-cms/ministero-della-salute-prevenzione-e-controllo-dellinfluenza-raccomandazioni-per-la-stagione-20142015/	government	1	0	0	1	0	0	0	0	0	1	1	1	1	4	183
http://www.iobenessereblog.it/prevenire-influenza-dieta-fitoterapia/21261	other	0	0	0	0	1	1	1	0	0	1	0	1	1	3	184
https://it.lifestyle.yahoo.com/linfluenza-uccide-100-volte-pi%C3%B9-100000118.html	other	1	0	1	1	0	0	0	0	0	0	0	1	1	2	185
http://guide.supereva.it/fitoterapia/interventi/2008/01/319323.shtml	portal	0	0	0	0	0	0	1	0	0	1	0	1	0	2	186
http://besport.org/sportmedicina/prevenire_influenza.htm	portal	1	0	0	0	0	0	0	0	0	1	0	1	1	3	187
http://wisesociety.it/salute-e-benessere/per-prevenire-linfluenza-in-soccorso-arriva-la-dieta/	portal	0	0	0	0	0	1	0	0	0	0	0	1	1	2	188
http://www.salute-e-benessere.org/salute/prevenire-linfluenza-prova-echinacea-e-aloe-vera/	other	0	0	0	0	0	0	1	0	0	1	0	1	0	2	189
http://www.inerboristeria.com/cure-naturali/influenza-raffreddore-cure-naturali.html	portal	0	0	0	0	0	0	1	0	0	0	0	0	0	0	190
https://bibliotecabiomedica.wordpress.com/2014/09/10/prevenzione-e-controllo-dellinfluenza-online-la-circolare-ministeriale-per-2014-2015/	government	1	0	0	1	0	0	0	0	0	1	1	1	1	4	192
http://www.tuttasalute.net/31148/prevenire-linfluenza-e-potenziare-il-sistema-immunitario-con-prodotti-naturali.html	other	0	0	0	0	0	1	0	0	0	0	0	1	0	1	193
http://www.simg.it/simg-e-federanziani-contro-linfluenza-affidatevi-al-vaccino-claudio-cricelli-la-prevenzione-resta-larma-vincente/	professional	1	0	0	0	0	0	0	0	0	1	0	1	1	3	197
http://www.mammamedico.it/malattie-infettive/linfluenza-sintomi-terapia-prevenzione/	other	1	0	0	0	0	0	0	0	0	0	0	1	1	2	198
http://www.viversano.net/salute/cure-naturali/miele-e-rosa-canina-contro-influenza/	portal	0	0	0	0	0	1	0	0	0	0	0	1	1	2	200

## Sheet: vaccine-EN
Url	rank	CLASS	pro	con	neutral	Authorship	Attribution	Disclosure	Currency	Total JAMA	archive
http://www.nhs.uk/conditions/vaccinations/pages/flu-influenza-vaccine.aspx	1	government	1	0	0	1	1	1	1	4	http://www.webcitation.org/6Z9guSEkm
http://www.dailymail.co.uk/news/article-2943269/Fatal-delays-flu-jab-Health-bosses-knew-six-months-vaccine-defective-thousands-died-thinking-safe.html	2	journalism	1	0	0	1	0	1	1	3	http://www.webcitation.org/6Z9hAag76
http://www.dailymail.co.uk/news/article-2941896/Flu-jab-waste-time-97-patients-Vaccine-developed-year-ago-no-longer-matches-virus-mutated-much.html	3	journalism	0	0	1	1	0	1	1	3	http://www.webcitation.org/6Z9hZ28b2
http://www.bbc.co.uk/news/health-31145604	4	journalism	0	0	1	1	0	1	1	3	http://www.webcitation.org/6Z9hwKfPY
http://www.telegraph.co.uk/news/health/news/11393560/Flu-jab-given-to-millions-is-useless.html	5	journalism	1	0	0	1	0	1	1	3	http://www.webcitation.org/6Z9hzgXfN
http://www.cdc.gov/flu/protect/keyfacts.htm	6	government	1	0	0	1	1	1	1	4	http://www.webcitation.org/6Z9i3Vmq7
http://en.wikipedia.org/wiki/Influenza_vaccine	7	other	0	0	1	1	1	1	1	4	http://www.webcitation.org/6Z9szrJgv
http://www.theguardian.com/society/2015/feb/05/flu-vaccine-low-protection-uk-this-winter	8	journalism	0	0	1	0	0	1	1	2	http://www.webcitation.org/6Z9t3amvr
https://www.gov.uk/government/uploads/system/uploads/attachment_data/file/368079/PHE_8879_Flu_2014_A5_General_leaflet_14_.pdf	9	government	1	0	0	1	0	1	1	3	http://www.webcitation.org/6Z9t5jtdd
http://www.flu.gov/prevention-vaccination/vaccination/	10	government	1	0	0	1	1	1	1	4	http://www.webcitation.org/6Z9t7WyHI
http://www.theguardian.com/politics/2015/feb/06/flu-vaccine-mismatch-public-health-strain	11	journalism	0	0	1	1	0	1	1	3	http://www.webcitation.org/6Z9tA6EW1
http://www.theguardian.com/society/2015/feb/06/next-winter-flu-vaccine-may-not-be-effective	12	journalism	0	0	1	1	0	1	1	3	http://www.webcitation.org/6Z9tCFJjs
http://www.mirror.co.uk/news/uk-news/flu-jabs-almost-useless-97-5114455	13	journalism	0	0	1	1	0	1	1	3	http://www.webcitation.org/6Z9tEAJX2
http://www.boots.com/en/Pharmacy-Health/Health-shop/Cough-cold-flu/Flu-Vaccinations/	14	commercial	1	0	0	0	0	1	1	2	http://www.webcitation.org/6Z9tIT6F2
http://news.sky.com/story/1422308/flu-jab-found-to-work-in-just-3-percent-of-cases	15	journalism	0	0	1	0	0	1	1	2	http://www.webcitation.org/6Z9uQFrZm
http://www.babycenter.com/0_the-flu-vaccine-for-children_1463462.bc	17	commercial	1	0	0	0	1	1	0	2	http://www.webcitation.org/6Z9uUszcg
http://www.patient.co.uk/health/influenza-immunisation	18	portal	1	0	0	1	1	1	1	4	http://www.webcitation.org/6Z9uXAZMk
http://www.carersuk.org/help-and-advice/health/looking-after-your-health/flu-jabs	19	no profit	1	0	0	0	0	1	0	1	http://www.webcitation.org/6Z9uaTNrD
http://www.channel4.com/news/flu-influenza-vaccine-ineffective-health-winter-deaths	21	journalism	0	0	1	0	1	1	1	3	http://www.webcitation.org/6Z9ug27ar
http://www.lloydspharmacy.com/en/info/winter-flu-vaccination	22	commercial	1	0	0	0	0	1	0	1	http://www.webcitation.org/6Z9uikKpg
http://www.webmd.com/cold-and-flu/news/20141204/this-years-flu-vaccine-less-effective-than-hoped	23	portal	0	0	1	1	0	1	1	3
http://kidshealth.org/parent/general/body/flu_vaccine_good.html	24	no profit	1	0	0	1	0	1	1	3
http://www.nidirect.gov.uk/flu-vaccination	25	government	1	0	0	0	1	1	0	2
http://www.express.co.uk/life-style/health/556462/Flu-jab-blamed-for-rise-in-death-toll	26	journalism	0	0	1	1	0	1	1	3
http://www.diabetes.org.uk/Guide-to-diabetes/Managing-your-diabetes/Flu-vaccination/	27	no profit	1	0	0	0	0	1	0	1
http://www.ageuk.org.uk/health-wellbeing/conditions-illnesses/get-flu-protected/	28	no profit	1	0	0	0	0	1	0	1
http://www.flujabs.org/	29	professional	1	0	0	0	0	1	0	1
http://www.nbcnews.com/health/cold-flu/flu-vaccine-doesnt-work-europe-either-n301011	30	journalism	0	0	1	0	1	0	0	1
http://www.fluawareni.info/vaccination	31	government	1	0	0	0	1	1	0	2
http://www.hpb.gov.sg/HOPPortal/article?id=552	32	government	1	0	0	0	0	1	1	2
http://www.hse.ie/eng/health/hl/hcaiamr/flu/fluvaccine/	33	government	1	0	0	0	1	1	1	3
http://your.morrisons.com/Lifestyle/Health-and-pharmacy/Flu-jab/	34	commercial	1	0	0	0	0	1	0	1
http://www.carers.org/news/carers-encouraged-claim-free-flu-jab-winter	35	no profit	1	0	0	0	0	1	0	1
http://www.fleetstreetclinic.com/content/flu-vaccination-service-central-london-and-nationwide	36	commercial	1	0	0	0	0	1	0	1
http://www.tesco.com/groceries/MarketingContent/Sites/Retail/superstore/Online/p/i/zones/healthcare-pharmacy/pdf/20743%20Flu%20Jab%20Service%20Pharmacy%20Leaflet%206pp_V2.pdf?=	37	commercial	1	0	0	0	0	1	0	1
http://www.rowlandspharmacy.co.uk/services/flujabservice/	38	commercial	1	0	0	0	0	1	0	1
http://www.bupa.co.uk/individuals/self-pay-treatments/flu-vaccinations	39	commercial	1	0	0	0	0	1	0	1
http://io9.com/every-single-flu-vaccine-myth-debunked-1648554144	40	journalism	1	0	0	1	1	1	1	4
https://www.bhf.org.uk/heart-health/living-with-a-heart-condition/seasonal-influenza	41	no profit	1	0	0	0	1	1	0	2
http://www.healthlinkbc.ca/healthfiles/hfile12c.stm	42	government	1	0	0	1	1	1	1	4
http://www.immunisationscotland.org.uk/vaccines-and-diseases/seasonalflu/childflu.aspx	43	government	1	0	0	1	1	1	1	4
https://www.facebook.com/getthejab	45	government	1	0	0	1	1	0	1	3
http://www.britishlivertrust.org.uk/about-us/campaigns/get-the-jab/	46	no profit	1	0	0	0	1	0	0	1
http://www.independent.co.uk/life-style/health-and-families/health-news/new-winter-flu-vaccine-given-to-millions-barely-works-according-to-public-health-officials-10027186.html	47	journalism	0	0	1	1	0	1	1	3
http://www.superdrug.com/microsite/flu-jab	51	commercial	1	0	0	0	0	0	0	0
http://bma.org.uk/practical-support-at-work/doctors-well-being/flu-vaccination	52	professional	1	0	0	1	0	1	0	2
http://www.itv.com/news/2015-02-06/current-winter-flu-jab-only-has-3-success-rate/	53	journalism	0	0	1	0	1	1	1	3
http://www.babycentre.co.uk/x556202/is-it-safe-to-have-the-seasonal-flu-jab-during-pregnancy	54	commercial	1	0	0	0	0	1	1	2
http://www.government.nl/issues/vaccinations/seasonal-flu-vaccination	55	government	1	0	0	1	0	1	0	2
http://scienceblogs.com/insolence/2014/12/05/no-the-cdc-did-not-just-apologize-and-admit-that-this-years-flu-vaccine-doesnt-work/	56	other	1	0	0	1	1	1	1	4
http://www.brighton-hove.gov.uk/content/health-and-social-care/health-and-wellbeing/seasonal-flu-jab	57	government	1	0	0	0	0	1	0	1
http://www.mndassociation.org/life-with-mnd/treatment-and-care/Flu+jabs	58	no profit	1	0	0	0	0	1	0	1
http://www.forbes.com/sites/stevensalzberg/2014/11/03/shocking-report-on-flu-vaccine-is-neither-shocking-nor-correct/	59	journalism	1	0	0	1	1	1	1	4
http://www.cnn.com/2014/12/04/health/flu-vaccine-mutated-virus/	60	journalism	0	0	1	1	1	1	1	4
http://www.arthritisresearchuk.org/arthritis-information/q-and-a/causes-of-arthritis/can-flu-jab-cause-ra-flare.aspx	61	no profit	1	0	0	1	0	1	1	3
http://www.naturalnews.com/047890_flu_vaccines_CDC_apology_medical_fraud.html	62	no profit	0	1	0	1	1	0	1	3	http://www.webcitation.org/6bO17Zj6J
http://www.gloucestershireccg.nhs.uk/your-health/health-topic/winter/seasonal-flu/seasonal-flu-vaccination/	63	government	1	0	0	1	0	1	0	2
http://www.leeds.gov.uk/residents/Pages/Be-a-flu-fighter.aspx	64	government	1	0	0	1	0	1	0	2
http://news.yahoo.com/flu-vaccine-not-working-well-only-23-percent-180144538.html	65	journalism	1	0	0	1	1	1	1	4
http://www.coventry.gov.uk/info/166/health_protection/2071/who_is_entitled_to_a_free_flu_jab	67	government	1	0	0	0	0	1	1	2
http://www.hickeyspharmacies.ie/healthcare-services/flu-vaccination.295.html	68	commercial	0	0	1	0	0	1	0	1
http://www.netdoctor.co.uk/healthyliving/secondopinion/flu.htm	70	portal	1	0	0	1	0	1	1	3
http://www.nhsemployers.org/campaigns/flu-fighter	71	government	1	0	0	0	0	1	0	1
http://www.dolphinspractice.co.uk/flujabs.shtml	73	professional	1	0	0	1	0	1	0	2
http://www.fda.gov/downloads/BiologicsBloodVaccines/Vaccines/ApprovedProducts/UCM220624.pdf	74	government	0	0	1	1	1	1	1	4
http://www.medicinenet.com/flu_vaccination/article.htm	75	portal	1	0	0	1	1	0	1	3
http://blogs.spectator.co.uk/spectator-surgery/2014/10/beware-the-vaccine-marketing-but-do-get-your-flu-jab/	76	journalism	1	0	0	1	1	1	1	4
http://www.pamf.org/flu/qanda.html	78	professional	1	0	0	0	1	1	1	3
http://www.nottinghamcity.nhs.uk/healthy-living/seasonal-flu-jab.html	80	government	1	0	0	0	0	1	0	1
http://www.southwark.gov.uk/info/200462/public_health/3596/flu_jab_2014	81	government	1	0	0	1	1	1	1	4
http://www.boots.ie/en/Boots-Winter-Flu-Vaccination-Service_1343876/	83	commercial	1	0	0	0	0	1	0	1
http://www.skepticalraptor.com/skepticalraptorblog.php/dumb-asses-flu-vaccine/	84	other	1	0	0	0	1	1	1	3
http://www.theweek.co.uk/health-science/60733/flu-vaccine-who-should-get-a-flu-jab-this-year	86	journalism	1	0	0	0	0	1	1	2
http://www.wolverhampton.gov.uk/article/3750/Flu-jabs	88	government	1	0	0	0	1	1	0	2
http://www.northumberland.gov.uk/default.aspx?page=16530	89	government	1	0	0	0	0	0	0	0
http://www.careuk.com/care-homes/news/the-flu-jab-don-t-believe-everything-you-read-in-the-papers	91	commercial	1	0	0	0	0	1	1	2
http://www.medicalnewstoday.com/articles/288153.php	92	portal	0	0	1	1	1	1	1	4
http://www.cancerresearchuk.org/about-cancer/cancers-in-general/cancer-questions/should-i-have-the-flu-vaccine	93	no profit	1	0	0	0	0	1	0	1
http://www.today.com/health/flu-vaccine-barely-working-year-cdc-says-1D80428360	94	journalism	0	0	1	1	1	1	1	4
http://www.vaccinationcouncil.org/2013/11/27/a-shot-never-worth-taking-the-flu-vaccine-by-kelly-brogan-md/	95	no profit	0	1	0	1	1	1	1	4	http://www.webcitation.org/6bO1CoTf5
http://www.everydayhealth.com/drugs/influenza-virus-vaccine-live-trivalent	97	portal	1	0	0	1	0	1	1	3
http://www.abc.net.au/health/thepulse/stories/2015/03/16/4198318.htm	99	journalism	1	0	0	1	1	1	1	4
http://www.england.nhs.uk/tag/flu-jab/	100	government	1	0	0	0	1	1	1	3
http://www.sciencebasedmedicine.org/no-the-cdc-did-not-just-admit-that-this-years-flu-vaccine-doesnt-work/	101	professional	1	0	0	1	1	1	1	4
http://www.manchestereveningnews.co.uk/news/flu-jab-greater-manchester-supermarkets-7851052	102	journalism	0	0	1	1	1	1	1	4
http://www.provide.org.uk/get-your-flu-jab	103	commercial	1	0	0	0	0	0	0	0
http://www.focusondisability.org.uk/flu-jab-information.html	104	commercial	1	0	0	0	0	0	0	0
http://www.thelocal.no/20141107/flu-jab-in-norway-has-limited-effect-study	105	journalism	0	0	1	0	0	1	1	2
http://www.cbc.ca/news/health/flu-vaccine-paradox-adds-to-public-health-debate-1.2912790	106	journalism	0	0	1	1	1	0	1	3
http://www.gloucestershire.gov.uk/article/117946/At-risk-groups-urged-to-have-seasonal-flu-jab-to-stay-healthy-this-winter	107	government	1	0	0	0	0	1	0	1
http://lungfoundation.com.au/dodge-the-winter-cold-with-a-flu-jab/	108	no profit	1	0	0	0	1	1	1	3
http://www.salford.gov.uk/flujabs.htm	109	government	1	0	0	0	0	1	1	2
http://www.hollandandbarrett.com/advice-articles/seasonal-wellbeing/should-you-have-a-flu-jab/	110	commercial	1	0	0	0	0	1	0	1
http://www.southglos.gov.uk/health-and-social-care/staying-healthy/flu-vaccinations/flu-jab-for-pregnant-women/	111	government	1	0	0	0	1	1	0	2
http://blogs.plos.org/publichealth/2014/12/12/flu-shot-isnt-good-match-year-ever/	112	professional	1	0	0	1	1	1	1	4
http://articles.mercola.com/sites/articles/archive/2015/01/20/epic-fail-influenza-vaccine.aspx	114	commercial	0	1	0	1	1	1	1	4	http://www.webcitation.org/6bO1G0rSD
http://www.livescience.com/40279-flu-shot-information.html	115	journalism	1	0	0	1	1	1	1	4
http://chemistry.about.com/cs/howthingswork/a/aa011604a.htm	116	other	0	0	1	1	1	1	1	4
http://www.dailyrecord.co.uk/news/real-life/family-fight-compensation-after-swine-4999114	117	journalism	0	1	0	1	0	1	1	3	http://www.webcitation.org/6bO1KO5xx
http://www.bmj.com/content/349/bmj.g6182	118	professional	0	1	0	1	1	1	1	4	http://www.webcitation.org/6bO1PH5Ag
http://theconversation.com/the-heart-of-the-matter-how-effective-is-the-flu-jab-really-14048	120	journalism	1	0	0	1	1	1	1	4
http://www.perthnow.com.au/news/western-australia/parents-of-saba-button-who-was-victim-of-flu-vaccine-debacle-receive-payout-from-wa-government/story-fnhocxo3-1226945651845	121	journalism	0	1	0	1	1	0	1	3	http://www.webcitation.org/6bO1Rx4C6
http://freakonomics.com/2015/01/08/why-doesnt-everyone-get-the-flu-vaccine-a-new-freakonomics-radio-podcast/	122	other	0	0	1	1	1	1	1	4
http://www.warwickshire.gov.uk/flu	123	government	1	0	0	0	0	1	0	1
http://www.washingtonpost.com/news/to-your-health/wp/2015/01/15/cdc-flu-vaccine-only-23-percent-effective-this-season-but-still-better-than-nothing/	124	journalism	0	0	1	1	1	1	1	4
http://www.irishexaminer.com/ireland/flu-fear-as-hse-admits-vaccine-mismatch-307310.html	125	journalism	0	0	1	0	0	1	1	2
http://gizmodo.com/why-the-flu-vaccine-doesnt-always-work-1677122912	126	journalism	0	0	1	1	1	1	1	4
http://vaxtruth.org/2011/09/the-flu-vaccine-what-your-doctor-wont-tell-you-or-probably-doesnt-even-know/	127	other	0	1	0	0	1	0	1	2	http://www.webcitation.org/6bO1Um5W4
http://healthycanadians.gc.ca/diseases-conditions-maladies-affections/disease-maladie/flu-grippe/index-eng.php	128	government	1	0	0	1	1	1	1	4
http://blogs.wsj.com/pharmalot/2014/12/01/italy-investigates-novartis-flu-vaccine-after-12-deaths-are-reported/	129	journalism	0	0	1	1	1	1	1	4	http://www.webcitation.org/6b33Iy5GB
http://time.com/3610872/italy-flu-vaccine-deaths/	130	journalism	0	0	1	1	1	1	1	4	http://www.webcitation.org/6b33NRebv
http://www.bostonglobe.com/lifestyle/health-wellness/2014/09/21/why-half-still-skip-yearly-flu-vaccine/XqCYkDZyf132ZQCoZa8kyI/story.html	131	journalism	0	0	1	1	1	1	1	4
http://home.bt.com/lifestyle/wellbeing/the-flu-jab-should-you-have-it-11363936205321	132	other	1	0	0	1	0	1	1	3
http://www.nvic.org/vaccines-and-diseases/Influenza/flufacts.aspx	133	no profit	0	0	1	0	0	1	0	1
http://www.vaccines.gov/diseases/flu/	135	government	1	0	0	1	1	1	1	4
http://www.npr.org/blogs/health/2014/10/10/354627818/32-myths-about-the-flu-vaccine-you-dont-need-to-fear	137	journalism	1	0	0	1	1	1	1	4
http://www.pharmhealth.ie/Pharmacy-services/winter-flu-vaccination-service.html	138	commercial	1	0	0	0	1	1	0	2
http://www.healthline.com/health/flu-shot-side-effects	139	portal	0	0	1	0	0	1	0	1
http://www.drbriffa.com/2013/11/22/flu-vaccination-is-most-certainly-not-a-no-brainer/	140	commercial	0	1	0	1	1	1	1	4	http://www.webcitation.org/6bO1o4Nzr
https://www.epilepsy.org.uk/news/news/flu-vaccine-and-epilepsy-64246	141	no profit	0	0	1	0	0	1	1	2
http://jama.jamanetwork.com/article.aspx?articleid=1758749	142	professional	1	0	0	1	1	1	1	4
http://www.salon.com/2014/09/11/5_bogus_excuses_people_use_to_avoid_the_flu_vaccine/	143	journalism	1	0	0	1	0	1	1	3
http://www.scientificamerican.com/article/a-flu-vaccine-thats-always-in-season/	144	journalism	0	0	1	1	0	1	1	3
http://www.iflscience.com/health-and-medicine/no-cdc-did-not-apologize-and-say-flu-vaccine-doesn-t-work	145	other	1	0	0	1	0	0	1	2
http://www.techtimes.com/articles/21522/20141204/flu-vaccine-may-be-useless-against-current-mutant-but-its-too-late-to-change-it.htm	147	journalism	0	0	1	1	1	0	1	3
http://wavesnz.org.nz/whooping-cough-flu-jab-and-other-vaccine-efficacy/	148	other	0	1	0	0	0	0	0	0	http://www.webcitation.org/6bO1znfzS
http://sante.gouv.qc.ca/en/programmes-et-mesures-daide/programme-de-vaccination-contre-la-grippe/	149	government	1	0	0	0	0	1	1	2
http://blog.blf.org.uk/2014/09/flu-jab/	150	no profit	1	0	0	1	1	1	1	4
http://www.walesonline.co.uk/news/health/pregnant-women-urged-protect-unborn-7927904	151	journalism	1	0	0	1	1	1	1	4
https://www.breastcancercare.org.uk/news/blog/flu-jab-do-you-need-one	152	no profit	1	0	0	1	1	1	1	4
http://www.primarycarerecruitment.co.uk/index.php/news/68-flu-jab-at-primary-care	153	commercial	1	0	0	0	0	1	0	1
https://www.forumhealthcentre.nhs.uk/your-health/faqs-the-flu-jab-in-pregnancy	154	government	1	0	0	0	1	1	0	2
http://www.vaccinestoday.eu/vaccines/is-the-flu-vaccine-an-ethical-obligation-for-doctors/	156	commercial	1	0	0	1	1	0	1	3
http://www.niaid.nih.gov/topics/flu/understandingflu/pages/seasonalvaccine.aspx	157	government	1	0	0	0	1	1	1	3
http://www.irishtimes.com/news/health/hse-urges-people-in-at-risk-groups-to-get-flu-jab-1.1957659	159	journalism	1	0	0	0	1	1	1	3
http://www.warrington.gov.uk/news/article/1518/don_t_put_off_your_flu_jab	160	government	1	0	0	0	1	1	1	3
http://www.viking2.co.uk/local/the-flu-jab-from-your-pharmacy/	161	journalism	1	0	0	0	0	1	0	1
http://www.redwineandapplesauce.com/2014/10/10/33-flu-vaccine-myths/	162	other	1	0	0	1	1	1	1	4
http://www.yorkshirepost.co.uk/news/nhs/flu-jab-is-not-a-waste-of-time-1-7095301	163	journalism	1	0	0	1	1	1	1	4
http://www.mysurgerywebsite.co.uk/info.aspx?p=8&pr=X82044	166	professional	1	0	0	0	0	0	0	0
http://www.buchananspharmacy.co.nz/shop/Cold_Flu/Influenza+Vaccination.html	167	commercial	1	0	0	0	0	1	0	1
http://healthimpactnews.com/2014/government-pays-damages-to-vaccine-victims-flu-shot-most-dangerous-with-gbs-and-death-settlements/	168	journalism	0	1	0	0	1	0	1	2	http://www.webcitation.org/6bO22SnnS
http://www.asthma.org.uk/knowledge-bank-living-with-asthma-flu-vaccinations	169	no profit	1	0	0	0	0	1	1	2
http://www.nicma.org/cms/news-a-events/562-winter-flu-jab-service	170	commercial	1	0	0	0	0	1	0	1
http://www.usatoday.com/story/news/health/2013/02/21/flu-vaccine-doesnt-work-over-65/1934651/	171	journalism	0	0	1	1	0	1	1	3
http://www.thejournal.ie/flu-jab/news/	172	journalism	0	0	1	0	1	1	1	3				no/class	%
http://ww2.health.wa.gov.au/Corporate/Media-Releases/Winter-flu-jab-more-convenient	173	government	1	0	0	1	0	1	1	3			Government (G)	39	23.2143
http://www.moathousesurgery.co.uk/website/D81060/files/Who_should_have_the_seasonal_flu_jab.rtf	174	professional	1	0	0	0	0	0	0	0			Commercial (C)	25	14.881
http://southlincolnshireccg.nhs.uk/news-a-events/230-get-the-flu-jab-be-flu-safe	176	government	1	0	0	0	1	0	0	1			Journalistic (J)	51	30.3571
http://www.healthyperformance.co.uk/a-flu-jab-is-it-worth-the-effort/	177	commercial	1	0	0	1	0	1	0	2			Professional (PRO)	13	7.7381
http://www.thesundaytimes.co.uk/sto/news/uk_news/Health/article1382119.ece	178	journalism	0	0	1	1	0	1	0	2			Portals (HP)	8	4.7619
http://www.nightdaymedical.com/tag/flu-jab/	180	professional	0	0	1	0	0	0	1	1			Others (O)	14	8.33333
http://www.beyondconformity.co.nz/hilarys-desk/flu-jab-doesnt-work-in-healthy-elderly	181	other	0	1	0	1	1	1	1	4	http://www.webcitation.org/6bO28VRS8
http://www.newscientist.com/article/dn24772-flu-vaccine-helps-unravel-complex-causes-of-narcolepsy.html	182	journalism	0	0	1	1	1	1	1	4				150	89.2857
http://www.stuff.co.nz/national/health/10280394/Flu-jab-not-total-defence	184	journalism	0	0	1	1	0	1	1	3
http://www.health.govt.nz/your-health/conditions-and-treatments/diseases-and-illnesses/influenza	186	government	1	0	0	0	1	1	0	2
http://www.irishhealth.com/askdoc.html?q=5610	187	portal	0	0	1	0	0	0	0	0
http://www.babycenter.com.au/x556202/is-it-safe-to-have-the-seasonal-flu-jab-during-pregnancy	189	commercial	1	0	0	1	0	1	1	3
http://www.mumsnet.com/Talk/pregnancy/a2324746-GP-wants-me-to-pay-for-flu-jab	190	other	0	0	1	0	0	0	1	1
http://www.wakefield.gov.uk/Pages/News/PR4830.aspx	191	government	1	0	0	1	0	1	0	2
http://www.sunraysiadaily.com.au/story/2933946/delay-for-the-flu-jab/	192	journalism	0	0	1	1	0	1	1	3
https://healthunlocked.com/flu-jab	193	other	0	0	1	0	0	0	1	1
https://books.google.com/books?id=ptWg-IQ90K0C&pg=PT75&lpg=PT75&dq=flu+jab&source=bl&ots=2Arg30NvPX&sig=1gxZSW6qwYAMiUt64SsD1A55vSg&hl=en&sa=X&ei=IFUIVcTbCork7AbQqYCYBg&ved=0CO0EEOgBMF84ZA	194	professional	0	0	1	1	1	1	1	4
http://castlepointandrochfordccg.nhs.uk/77-home/249-it-s-not-too-late-to-get-your-flu-jab	195	government	1	0	0	0	0	1	0	1
http://www.hackneyicare.org.uk/kb5/hackney/asch/advice.page?id=AvGPdymjRLs&category=2	196	professional	1	0	0	0	0	1	0	1
http://psnc.org.uk/buckinghamshire-lpc/wp-content/uploads/sites/30/2014/08/Book-FREE-Flu-jab-poster-2014.pdf	197	government	1	0	0	0	0	1	0	1
http://www.cbmwalkers.org/files/Flu-jab-2.pdf	198	other	1	0	0	0	0	0	0	0

## Sheet: vaccine-IT
	Ranking	classcategory	pro	con	MILDae	SERIOUSae	neutral	Authorship	Attribution	Disclosure	Currency	Total JAMA	deposit
http://www.ilfattoquotidiano.it/2014/12/09/vaccino-antinfluenzale-dati-mortalita-fede/1258733/	1	journalism	0	1	0	0	0	1	1	1	1	4	http://www.webcitation.org/6Z8VM2Ipp
http://it.wikipedia.org/wiki/Vaccino_antinfluenzale	2	other	0	0	0	0	1	1	1	1	1	4	http://www.webcitation.org/6Z8XTD8u0
http://www.tantasalute.it/s/vaccino-antinfluenzale/	3	journalism	0	0	0	0	1	1	0	1	1	3	http://www.webcitation.org/6Z8VoYl2l
http://messaggeroveneto.gelocal.it/udine/cronaca/2014/12/06/news/vaccinazione-antinfluenzale-l-ordine-invita-alla-cautela-1.10444966	4	journalism	1	0	0	0	0	1	0	1	1	3	http://www.webcitation.org/6Z8XKuBZm
http://www.sanita.regione.lombardia.it/cs/Satellite?c=Redazionale_P&childpagename=DG_Sanita%2FDetail&cid=1213370431966&pagename=DG_SANWrapper	5	government	1	0	0	0	0	1	1	1	1	4	http://www.webcitation.org/6Z8Xw1OF8
http://www.salute.gov.it/portale/p5_1_1.jsp?lingua=italiano&id=103	6	government	1	0	0	0	0	1	0	1	1	3	http://www.webcitation.org/6Z8XrtAXT
http://www.ilsole24ore.com/art/notizie/2014-11-29/vaccini-antinfluenzali-morti-sospette-salgono-12-ministro-lorenzin-primi-test-negativi-220813.shtml?uuid=ABiFgtJC	7	journalism	0	0	0	0	1	1	0	1	1	3	http://www.webcitation.org/6Z8Y5E0Mo
http://www.meteoweb.eu/2014/12/nfluenza-20142015-cause-sintomi-cura-vaccino-antinfluenzale-prevenzione/364236/	8	journalism	0	0	0	0	1	1	1	1	1	4	http://www.webcitation.org/6Z8YFB7c4
http://www.altroconsumo.it/salute/influenza/news/vaccino-antinfluenzale-ritirato-fluad-novartis	9	journalism	0	0	0	0	1	0	0	1	1	2	http://www.webcitation.org/6Z8YgS4gz
http://www.liberoquotidiano.it/news/italia/11726962/Vaccino-antinfluenzale-sotto-accusa--a.html	10	journalism	1	0	0	0	0	0	0	1	1	2	http://www.webcitation.org/6Z9fOPwjP
http://www.agenziafarmaco.gov.it/it/content/aifa-dispone-il-divieto-di-utilizzo-due-lotti-del-vaccino-antinfluenzale-fluad-0	11	government	0	0	0	0	1	1	0	1	1	3	http://www.webcitation.org/6Z9fVowmV
http://www.ansa.it/saluteebenessere/notizie/rubriche/salute/2014/11/27/blocco-vaccini-antinfluenzali-dopo-3-morti-sospette-_f70e16ab-6aae-40e5-bb6d-286902dcc9ef.html	12	journalism	1	0	0	0	0	1	0	1	1	3	http://www.webcitation.org/6Z9fZCrBt
http://www.lastampa.it/2014/11/28/italia/cronache/vaccino-antinfluenzale-le-dieci-cose-da-sapere-dHChWAXIFMT1DbE4gOJAbM/pagina.html	13	journalism	0	0	0	0	1	0	0	1	1	2	http://www.webcitation.org/6Z9fdiZUR
http://www.corriere.it/salute/14_novembre_27/tre-morti-sospette-il-vaccino-l-aifa-bloccato-l-antinfluenzale-9c154fac-7650-11e4-8593-6ac58034c3d7.shtml	14	journalism	0	0	0	0	1	1	0	1	1	3	http://www.webcitation.org/6Z9fgugfV
http://www.ilmessaggero.it/PRIMOPIANO/SANITA/vaccino_antinfluenzale_morti_aifa_fluad/notizie/1036703.shtml	15	journalism	0	0	0	0	1	0	0	1	1	2	http://www.webcitation.org/6Z9ft6gTg
http://www.nonfartiinfluenzare.it/cont/i-vaccini/241/vaccino-antinfluenzale-deve-vaccinarsi.asp	16	commercial	0	0	0	0	1	0	1	1	0	2	http://www.webcitation.org/6Z9fxyokY
http://www.aslbrescia.it/bin/index.php?id=2312	17	government	1	0	0	0	0	0	0	1	1	2	http://www.webcitation.org/6Z9fzrSIH
http://www.unionesarda.it/articolo/cronaca_italiana/2014/11/28/vaccino_9_morti_sospette-5-397827.html	18	journalism	0	0	0	0	1	0	0	1	1	2	http://www.webcitation.org/6Z9gEQ4py
http://www.my-personaltrainer.it/salute-benessere/vaccino-influenza.html	19	other	0	0	0	0	1	1	0	0	0	1	http://www.webcitation.org/6Z9gMyIyW
http://www.asl.como.it/index.php/influenza-e-vaccinazione-antinfluenzale.html	20	government	1	0	0	0	0	0	0	1	0	1	http://www.webcitation.org/6Z9gRm17E
http://www.leggo.it/NEWS/ITALIA/blocco_vaccini_antinfluenzali_3_morti_sospette/notizie/1035247.shtml	22	journalism	0	0	0	0	1	1	0	1	1	3	http://www.webcitation.org/6Z9whUgIe
http://www.greenme.it/vivere/salute-e-benessere/15060-vaccino-antinfluenzale-cose-da-sapere	23	journalism	0	0	0	0	1	1	0	1	1	3
http://www.vaccinarsi.org/vaccini-disponibili/vaccino-anti-influenzale.html	24	professional	1	0	0	0	0	1	1	1	1	4
http://www.panorama.it/scienza/salute/morti-sospette-ritirato-vaccino-antinfluenzale/	25	journalism	0	0	0	0	1	0	0	1	1	2
http://www.vanityfair.it/news/italia/14/11/28/vaccino-antinfluenzale-il-caso	26	journalism	0	0	0	0	1	1	0	1	1	3
http://www.oggi.it/attualita/notizie/2014/12/02/il-vaccino-antinfluenzale-e-sicuro-e-bruno-vespa-lo-dimostra-in-diretta-tv/	27	journalism	1	0	0	0	0	0	0	1	1	2
http://www.wired.it/scienza/medicina/2014/11/28/vaccino-flaud-anti-influenza-morti-sospette/	28	journalism	0	0	0	0	1	1	0	1	1	3
http://www.ilsecoloxix.it/p/magazine/2014/11/27/ARnaDXhC-vaccino_antinfluenzale_lotti.shtml	29	journalism	0	0	0	0	1	0	0	1	1	2
http://www.si24.it/2014/11/29/vaccino-antinfluenzale-flaud-11-morti-sospette-aifa-non-si-eslude-il-ritiro-di-altri-lotti/74799/	30	journalism	0	0	0	0	1	0	0	1	1	2
http://palermo.repubblica.it/cronaca/2014/11/27/news/morti_sospette_in_sicilia_per_vaccino_antinfluenzale_crocetta_evitare_psicosi_lotti_ritirati_dalle_16-101590723/	31	journalism	0	0	0	0	1	1	0	1	1	3
http://www.asl.lecco.it/TEMPL_infodet.asp?IDLivello1=66&IDLivello2=484&IDLivello3=0&IDLT=1&IDInfo=2482	32	government	0	0	0	0	1	0	0	1	1	2
http://www.assis.it/cdc-questanno-il-vaccino-antinfluenzale-e-pressoche-inefficace/	33	no-profit	0	1	0	0	0	0	1	1	1	3
http://www.informazionisuifarmaci.it/database/fcr/sids.nsf/pagine/592642473F0EE4EAC125721E00471342?OpenDocument	34	professional	1	0	0	0	0	1	1	1	1	4
http://www.aslrma.com/auslromaa/index.php?option=com_content&view=article&id=444:home-vaccinazioni-new&catid=45:vaccinazioni&Itemid=553	35	government	1	0	0	0	0	0	1	1	1	3
http://www.flu.iss.it/vaccinazione.htm	36	government	1	0	0	0	0	0	0	1	0	1
http://www.ausl.vda.it/datapage.asp?l=1&id=1413	37	government	1	0	0	0	0	0	1	1	0	2
http://osservatoreitalia.it/index.asp?art=3105&arg=21&red=5	38	journalism	0	1	0	0	0	1	0	1	1	3
http://www.paginemamma.it/it/573/gravidanza/speciale-il-bimbo-da-0-a-3-anni/detail_143575_vaccino-antinfluenzale.aspx?c1=57&c3=8486	39	commercial	1	0	0	0	0	0	0	0	0	0
http://www.iltempo.it/cronache/2014/11/30/i-lotti-incriminati-diventano-sei-sospetti-su-un-altro-vaccino-1.1351595	40	journalism	0	0	0	0	1	1	0	1	1	3
http://www.quotidianosanita.it/scienza-e-farmaci/articolo.php?articolo_id=24633	41	journalism	0	0	0	0	1	0	0	1	1	2
http://www.ilmattino.it/salerno/sala_consilina_la_famiglia_morto_dopo_vaccino_antinfluenzale_la_procura_apre_un39inchiesta/notizie/1108446.shtml	42	journalism	0	0	0	0	1	0	0	1	1	2
http://www.lettera43.it/cronaca/vaccino-antinfluenzale-aumentano-le-morti-sospette_43675149634.htm	43	journalism		0	0	0	1	0	0	1	1	2
http://www.huffingtonpost.it/2014/12/01/vaccino-influenza_n_6246750.html	44	journalism	1	0	0	0	0	0	0	1	1	2
http://www.campagnainfluenza.it/2014/campagna_vaccinazione.php	45	government	1	0	0	0	0	1	1	1	0	3
http://www.aism.it/index.aspx?codpage=vaccinazione_antinfluenzale	46	no-profit	0	0	0	0	1	0	1	1	0	2
http://scienzaesalute.blogosfere.it/post/537468/vaccino-anti-influenzale-2014-fluad-morti	47	other	0	0	0	0	1	1	0	1	1	3
http://www.usl2.toscana.it/percorso_vita.php?id_nodo=133	48	government	1	0	0	0	0	0	0	1	1	2
http://www.benessere.com/salute/disturbi/influenza.htm	49	commercial	1	0	0	0	0	1	0	1	0	2
http://servizi.comune.fe.it/index.phtml?id=2944	50	government	1	0	0	0	0	1	0	1	1	3
http://www.rainews.it/dl/rainews/articoli/Vaccino-influenzale-Tre-morti-sospette-l-Aifa-lo-vieta-8260d564-114e-4148-8e82-9d87b596e521.html	51	journalism	0	0	0	0	1	0	0	1	1	2
http://www.usl11.toscana.it/pagina_0.php?pag=vaccinazione%7Cinfluenza&medfampag=medfam1&medfampos=13	52	government	0	0	0	0	1	0	0	0	1	1
http://www.aamterranuova.it/Medicina-Naturale/Vaccino-antinfluenzale-ora-si-scopre-che-e-anche-inefficace	53	journalism	0	1	0	0	0	1	1	1	1	4
http://www.blitzquotidiano.it/salute/vaccino-antinfluenzale-tre-morti-sospette-aifa-blocca-il-fluad-2034838/	55	journalism	0	0	0	0	1	0	0	1	2	3
http://www.bimbisaniebelli.it/malattie/vaccinazioni/vaccino-antinfluenzale-quali-bambini-devono-farlo-79366	56	journalism	1	0	0	0	0	0	0	1	0	1
http://www.farmacoecura.it/influenza/influenza-2008-2009-vaccino-prevenzione/	57	no-profit	1	0	0	0	0	1	1	1	1	4
http://www.angelini.it/wps/wcm/connect/it/Home/Patologie-e-cure/Malattie-da-raffreddamento/Speciali/Vaccinarsi-contro-influenza/	58	commercial	1	0	0	0	0	0	0	1	0	1
http://www.asl.milano.it/ita/Default.aspx?SEZ=10&PAG=88&NOT=6646	59	government	1	0	0	0	0	0	0	1	0	1
http://www.europaquotidiano.it/2014/11/27/vaccino-per-linfluenza-tre-morti-sospette/	60	journalism	0	0	0	0	1	0	0	1	1	2
http://www.saperesalute.it/in-farmacia/farmaci/vaccino-antinfluenzale	61	commercial	1	0	0	0	0	0	0	1	0	1	http://www.webcitation.org/6ZV8KBqUd
http://sip.it/formazione-aggiornamento/linee-guida/vaccinazione-antinfluenzale-in-eta-pediatrica	62	professional	1	0	0	0	0	0	0	1	0	1
http://www.ecodelchisone.it/news/2014-12-01/vaccino-antinfluenzale-non-ha-causato-morte-68enne-bargese-19157	64	journalism	0	0	0	0	1	0	0	1	1	2
http://www.direttanews.it/2014/12/23/vaccino-antinfluenzale-fluad-dati-negativi-sblocco-dei-lotti/	65	journalism	0	0	0	0	1	0	0	1	1	2
http://caltanissetta.gds.it/2014/12/05/caltanissetta-e-giallo-sulla-morte-di-un-pensionato-a-cui-era-stato-somministrato-il-vaccino-antinfluenzale_274554/	66	journalism	0	0	0	0	1	1	0	1	1	3
http://www.ulssvicenza.it/nodo.php/990	67	government	1	0	0	0	0	0	1	1	0	2
http://www.luogocomune.net/site/modules/news/article.php?storyid=4603	68	other	0	0	0	0	1	0	1	0	1	2
http://www2.aslbi.piemonte.it/cms/it/asl-biella/notizie/318-vaccinazione-antinfluenzale-2014-2015	69	government	0	0	0	0	1	0	0	1	0	1
http://papillevagabonde.blogspot.com/2015/02/perche-il-vaccino-antinfluenzale-non-ha.html	70	other	0	0	0	0	1	1	0	1	1	3
http://www.saninforma.it/biblioteca-della-salute/gravidanza-e-vaccinazione-antinfluenzale	71	commercial	0	0	0	0	1	0	0	0	0	0
http://salute.doctissimo.it/malattie/mali-di-stagione/il-vaccino-antinfluenzale.html	72	portal	1	0	0	0	0	1	0	1	1	3
http://www.avvenire.it/Cronaca/Pagine/vaccino-antinfluenzale-bloccato-dopo-3-morti.aspx	74	journalism	0	0	0	0	1	0	0	1	1	2
http://www.regione.toscana.it/-/vaccinarsi-contro-l-influenza	75	government	1	0	0	0	0	0	1	1	1	3
http://www.macrolibrarsi.it/speciali/vaccinazione-suina-a-h1n1-campagna-di-informazione-nazionale.php	76	commercial	0	1	0	0	0	1	0	1	0	2
http://alimentazionebambini.e-coop.it/attualita/vaccinazione-antinfluenzale-e-bambini-quando-farla/	77	commercial	1	0	0	0	0	1	0	1	0	2
http://www.fcr.re.it/database/fcr/farmacie.nsf/4cde79c085bc5503c125684d0047d9a0/70d7488e4f119118c1257576003daf74/$FILE/gravidanza%20e%20vaccini.pdf	78	government	1	0	0	0	0	0	0	0	0	0
http://www.ilgiorno.it/como/vaccino-fluad-influenza-1.442462	79	journalism	0	0	0	0	1	0	0	1	0	1
http://www.ilgazzettino.it/NORDEST/PRIMOPIANO/vaccino_antinfluenzale_farmacia_crollo_profilassi_veneto/notizie/1041213.shtml	80	journalism	1	0	0	0	0	0	0	1	1	2
https://www.fondazioneveronesi.it/articoli/altre-news/vaccino-antinfluenzale-allarmismo-ingiustificato/	81	professional	1	0	0	0	0	1	0	1	0	2
http://prevenzione.ulss20.verona.it/influenza_vaccinazione.html	82	government	1	0	0	0	0	0	0	1	1	2
http://tuttoggi.info/vaccino-antinfluenzale-morte-sospetta-in-umbria/246516/	83	journalism	0	0	0	0	1	0	0	1	1	2
http://www.mednat.org/vaccini/influenza.htm	84	other	0	1	0	0	0	0	0	0	0	0
http://www.salernotoday.it/cronaca/indagini-riesumazione-anziano-sala-consilina-vaccino-antinfluenzale.html	85	journalism	0	0	0	0	1	1	0	1	1	3
http://www.ilpost.it/2014/11/29/vaccini-fluad-morti/	86	journalism	0	0	0	0	1	0	0	1	1	2
http://autismovaccini.org/2015/01/27/vaccino-antinfluenzale-non-e-efficace-in-oltre-il-77-dei-casi/	87	other	1	0	0	0	0	0	1	1	1	3
http://www.padovaoggi.it/cronaca/vaccino-antinfluenzale-morti-padova-fluad.html	88	journalism	0	0	0	0	1	0	0	1	1	2
http://www.asl4.liguria.it/ovinternet/servlet/urd/run/portal.show?c=829	89	government	0	0	0	0	1	0	0	1	1	2
http://www.ilgiornale.it/news/cronache/tre-morti-sospette-laifa-sospende-due-lotti-vaccino-1071069.html	90	journalism	0	0	0	0	1	1	0	1	1	3
http://thedailynurse.eu/blog/2014/12/il-vaccino-antinfluenzale-puo-non-funzionare-ma/	91	other	1	0	0	0	0	0	0	1	0	1
http://www.affaritaliani.it/medicina/vaccino-antinfluenzale-non-mai-troppo-tardi140115.html	92	journalism	1	0	0	0	0	0	0	1	1	2
http://it.wikihow.com/Somministrare-un%27Iniezione-di-Vaccino-Antinfluenzale	94	other	0	0	0	0	1	0	1	0	0	1
http://notizie.virgilio.it/videonews/vaccino-antinfluenzale-scagionato-fluad-i-test-sono-negativi.html	95	other	0	0	0	0	1	1	0	0	1	2
http://www.milanolife.it/dove-fare-vaccino-antinfluenzale-milano-2014/	96	other	0	0	0	0	1	0	0	0	1	1
http://www.comune.modena.it/aree-tematiche/salute-e-servizi-socio-assistenziali/visite-ed-esami-medici-e-vaccinazioni/vaccinazione-antinfluenzale	97	government	0	0	0	0	1	0	0	1	1	2
http://www.comune.torino.it/protezionecivile/pdf/Ministero_della_salute.pdf	98	government	1	0	0	0	0	1	1	1	1	4
http://it.blastingnews.com/cronaca/2014/11/vaccino-antinfluenzale-salgono-a-otto-le-morti-sospette-e-psicosi-in-tutta-italia-00186929.html	100	other	0	0	0	0	1	1	1	0	1	3
http://www.aslolbia.it/index.php?xsl=7&s=9986&v=2&c=395	101	government	1	0	0	0	0	0	0	1	0	1
http://www.helpconsumatori.it/secondo-piano/blocco-vaccino-antinfluenzale-si-attiva-lagenzia-europea-dei-medicinali/89388	102	professional	1	0	0	0	0	0	1	1	0	2
http://www.farmacovigilanza.eu/content/vaccino-antinfluenzale-e-sindrome-di-guillain-barr%C3%A9-0	103	no-profit	0	0	0	0	1	0	0	1	0	1
http://www.asl3.liguria.it/ambulatori/servizi/igiene-e-sanit%C3%A0-pubblica/item/550-vaccinazione-antinfluenzale.html?format=html	104	government	1	0	0	0	0	0	0	1	0	1
http://www.aslromab.it/campagna_promozione_salute_roma/influenza.php	105	government	1	0	0	0	0	0	1	1	1	3
http://salute.pourfemme.it/s/vaccino-antinfluenzale/	106	journalism	1	0	0	0	0	0	0	0	0	0
http://www.strill.it/citta/2014/11/cosenza-lasp-ritira-il-vaccino-antinfluenzale/	108	government	0	0	0	0	1	1	1	1	1	4
http://www.businessonline.it/news/26946/vaccino-antifluenzale-2014-chi-rischia-i-sintomi-cosa-succede-dopo-le-morti-sospette-pericoli-in-diverse-regioni.html	109	journalism	0	0	0	0	1	1	0	0	1	2
http://www.intrage.it/SaluteEPrevenzione/vaccino_chi_deve_farlo	110	journalism	1	0	0	0	0	1	0	0	1	2
http://notizie.tiscali.it/articoli/cronaca/14/11/29/morti-vaccino-fluad-bloccato.html?cronaca	112	journalism	0	0	0	0	1	0	0	0	1	1
http://web.comune.settimomilanese.mi.it/content/view/264/9/	113	government	0	0	0	0	1	0	0	1	0	1
http://www.donnaclick.it/salute-donna/47047/vaccino-antinfluenzale-tutto-cio-che-ce-da-sapere/	114	portal	0	0	0	0	1	0	0	1	1	2
https://www.ulss17.it/index.cfm?method=mys.page&content_id=582	116	government	1	0	0	0	0	0	1	1	1	3
http://www.celiachia.it/menu/faq.aspx?idcat=6&idfaq=73	117	no-profit	0	0	0	0	1	1	0	1	1	3
http://www.italiasalute.it/News.asp?ID=9605	119	commercial	1	0	0	0	0	0	0	1	1	2
http://www.novartisvaccines.it/malattie-e-prevenzione/schede/influenza-vaccino.shtml	120	commercial	1	0	0	0	0	0	0	1	0	1
http://sadefenza.blogspot.com/2014/12/insegnanti-costretti-indossare-maschere.html	121	other	0	1	0	0	0	1	1	1	0	3
http://www.medicina360.com/vaccino-antinfluenzale.html	122	portal	1	0	0	0	0	0	0	0	0	0
http://www.today.it/scienze/vaccini-contro-influenza-situazione.html	123	journalism	0	0	0	0	1	0	0	1	1	2
http://www.comune.carlopoli.cz.it/last-news/9-ultime/203-avviso-somministrazione-vaccino-antinfluenzale	124	government	0	0	0	0	1	1	0	1	1	3
http://www.aslsassari.it/index.php?xsl=19&s=1&v=9&c=349&c1=2574&na=1&n=10	125	government	1	0	0	0	0	0	1	0	1	2
http://www.7per24.it/2014/12/01/vaccino-antinfluenzale-morti-sospette-a-bologna-e-a-parma/	126	journalism	0	0	0	0	1	1	0	1	1	3
http://www.aslrmf.it/joomla/index.php/informazioni-dalla-asl/campagne-di-interesse-pubblico/vaccinazioni	127	government	1	0	0	0	0	0	1	1	1	3
http://www.novartis.it/media/fatti-notizie/2014/20141127.shtml	128	commercial	1	0	0	0	0	0	0	1	1	2
https://it-it.facebook.com/notes/lo-sai-salute-e-alimentazione/vaccino-antinfluenzale-300000-dosi-ritirate-dal-mercato-per-gli-effetti-collater/176844602403523	129	other	0	0	0	0	1	0	0	0	1	1
http://www.agi.it/cronaca/notizie/allarme_per_il_vaccino_influenzale_morti_sospette_aifa_lo_vieta-201411271937-cro-rt10206	130	journalism	0	0	0	0	1	1	0	1	1	3
http://www.mediciesalute.it/argomenti/influenza.html	131	journalism	1	0	0	0	0	1	1	1	1	4
http://www.primadanoi.it/news/italia/555061/Fluad--vaccino-antinfluenzale--salgono.html	132	journalism	0	0	0	0	1	0	0	1	1	2
http://www.sienafree.it/salute-e-benessere/257-salute/67538-laifa-blocca-vaccino-antinfluenzale-fluad-prodotto-a-siena	133	journalism	0	0	0	0	1	0	0	1	1	2
http://www.mammeonline.net/phpBB3/vaccino-antinfluenzale-effetti-strani-t386037.html	134	other	0	0	0	0	1	0	0	0	1	1
http://www.disinformazione.it/vaccinazioneantinfluenzale.htm	135	other	0	1	0	0	0	1	0	0	0	1
http://www.ass2.sanita.fvg.it/notizie/vaccinazione-antinfluenzale-2014-2015	136	government	0	0	0	0	1	0	0	1	1	2
http://stefanotasca.altervista.org/vaccinazione-antinfluenzale.html	137	other	0	0	0	0	1	1	0	0	1	2
http://www.lasicilia.it/articolo/muore-dopo-vaccino-antinfluenzale-ci-sono-cinque-medici-indagati	138	journalism	0	0	0	0	1	0	0	1	1	2
http://www.imperiapost.it/80156/imperia-casi-di-morte-sospette-per-il-vaccino-antinfluenzale-lasl-1-in-provincia-non-stati-distribuiti-vaccini-fluad-la-campagna-continua	139	journalism	0	0	0	0	1	0	0	1	1	2
http://www.gazzettadasti.it/index.php/primo-piano/sanita/vaccino-antinfluenzale-in-piemonte-e-sicuro	140	journalism	0	0	0	0	1	0	0	1	1	2
http://www.ausl.mo.it/flex/cm/pages/ServeBLOB.php/L/IT/IDPagina/6271	141	government	1	0	0	0	0	0	0	1	1	2
http://www.regione.sardegna.it/j/v/25?s=268843&v=2&c=285&t=1	142	government	1	0	0	0	0	1	0	1	1	3
http://www.estense.com/?p=425843	143	journalism	0	0	0	0	1	0	0	1	1	2
http://www.quotidianopiemontese.it/2014/12/01/vaccino-antinfluenzale-lautopsia-sulluomo-cuneese-esclude-qualunque-legame-con-la-morte-guariniello-apre-uninchiesta-su-altri-casi/	144	other	0	0	0	0	1	0	0	0	1	1
http://www.asmn.re.it/campagna-di-vaccinazione-antinfluenzale-2013-2014	145	government	1	0	0	0	0	0	0	1	1	2
http://www.gudo.it/new/pdf/poster_manifesto_antinfluenzale_2014.pdf	146	government	1	0	0	0	0	1	0	1	1	3
http://www.usl6.toscana.it/usl6/index.php?option=com_content&view=article&id=2599:vaccino-antinfluenzale&catid=102&Itemid=272	147	government	1	0	0	0	0	1	0	1	1	3
http://www.vaccinarsicontrolinfluenza.ch/files/downloads/131128-BAG_saisonale-Grippe_Massenmedien_def_IT.pdf	148	government	1	0	0	0	0	0	0	1	0	1
http://www.rai.it/dl/tg3/articoli/ContentItem-a46ffe52-5d19-4170-8431-cb745658cb34.html	149	journalism	0	0	0	0	1	0	0	1	1	2
http://blog.quotidiano.net/malpelo/2014/11/27/vaccino-antinfluenzale-la-societa-italiana-di-medicina-generale-cautela-ma-niente-panico/	150	journalism	0	0	0	0	1	1	0	1	1	3
http://www.ausl.imola.bo.it/flex/cm/pages/ServeBLOB.php/L/IT/IDPagina/5951	151	government	1	0	0	0	0	0	1	1	1	3
http://www.sudpress.it/i-test-sul-vaccino-antinfluenzale-confermano-la-sicurezza-del-farmaco/	152	government	0	0	0	0	1	0	0	1	1	2
http://www.siracusanews.it/node/53777	153	journalism	0	0	0	0	1	0	1	1	1	3
http://www.targatocn.it/2014/11/29/leggi-notizia/argomenti/attualita/articolo/cuneese-la-prima-vittima-del-piemonte-riconducibile-al-vaccino-antinfluenzale.html	154	journalism	0	0	0	0	1	0	0	1	1	2
http://www.aslvallecamonicasebino.it/index.php?option=com_content&view=article&id=345:continua-la-campagna-antinfluenzale-stagione-2014-2015&catid=46:news	155	government	1	0	0	0	0	0	1	1	1	3
http://www.galileonet.it/2014/11/vaccino-antinfluenzale-ecco-il-numero-verde-del-ministero/	156	journalism	0	0	0	0	1	0	1	1	1	3
http://www.gazzettadelsud.it/news//118543/Vaccino-antinfluenzale--Attivo-il-numero.html	157	journalism	0	0	0	0	1	0	0	1	1	2
http://www.grandain.com/2014/12/01/decesso-del-paziente-di-barge-lautopsia-esclude-responsabilita-al-vaccino-antinfluenzale/	158	other	0	0	0	0	1	0	0	1	1	2
http://www.comune.roncobriantino.mb.it/index.php/ultime-notizie/avvisi/416-ritiro-lotti-vaccino-antinfluenzale-flaud	159	government	1	0	0	0	0	0	0	1	0	1
http://salute.regione.emilia-romagna.it/documentazione/materiale-informativo/pubblicazioni/archivio-pubblicazioni/io-mi-proteggo-dallinfluenza.-vaccinazione-antinfluenzale-cosa-e-necessario-conoscere-ottobre-2006	160	government	1	0	0	0	0	1	0	1	1	3
http://www.tgcom24.mediaset.it/cronaca/influenza-l-aifa-blocca-i-vaccini-fluad-segnalati-tre-casi-di-morti-sospette_2081688201402a.shtml	161	journalism	0	0	0	0	1	0	0	1	1	2
http://www.clicmedicina.it/pagine%20n%203/influenza_no%20vaccino.htm	162	journalism	0	0	0	0	1	0	0	1	0	1
http://www.americaoggi.info/2014/11/28/42668-vaccino-antinfluenzale-laifa-5-morti-sospette	163	journalism	0	0	0	0	1	0	1	1	1	3
http://www.savonanews.it/2014/11/28/leggi-notizia/argomenti/sanita/articolo/morti-sospette-sospeso-il-vaccino-antinfluenzale-fluad.html	164	journalism	0	0	0	0	1	0	0	1	1	2
http://www.univpm.it/Entra/Engine/RAServePG.php/P/337010010101/HH/1	165	government	1	0	0	0	0	1	1	1	1	4
http://www.pollinieallergia.net/gli-allergici-alle-uova-e-il-vaccino-antinfluenzale.-a183	166	professional	0	0	0	0	1	1	1	1	0	3
http://www.asl13.novara.it/wfprog/GetURL.exe?ID=2669&type=2	167	government	1	0	0	0	0	1	0	1	1	3
http://www.vesuviolive.it/ultime-notizie/56494-sospeso-il-vaccino-antinfluenzale-sale-5-il-numero-delle-morti-sospette/	168	journalism	0	0	0	0	1	1	0	1	1	3
http://mammaoggi.it/vaccino-antinfluenzale-2014-si-o-no/	169	other	0	0	0	0	1	0	0	0	1	1
http://ambientebio.it/bloccato-il-vaccino-antinfluenzale-novartis-per-morti-sospette/	171	other	0	0	0	0	1	0	0	0	1	1
http://www.foggiatoday.it/economia/morti-vaccino-antinfluenzale-fluad.html	172	journalism	0	0	0	0	1	0	0	1	1	2
http://www.ulss15.pd.it/nqcontent.cfm?a_id=1017	173	government	1	0	0	0	0	0	0	1	0	1
http://www.ilrestodelcarlino.it/ancona/vaccino-antinfluenzale-fluad-farmacie-1.442397	175	journalism	0	0	0	0	1	0	0	1	1	2
http://www.farmaciadelprete.com/index.php?option=com_content&view=article&id=185:e-arrivato-il-nuovo-vaccino-antinfluenzale&catid=32&Itemid=2	176	commercial	1	0	0	0	0	0	0	1	0	1
http://www.clinicacellini.it/pazienti/info/news/4382-vaccino-antinfluenzale-anche-per-il-personale-della-cellini	177	professional	1	0	0	0	0	1	1	1	1	4
http://www.prontuariobiellese.it/viewer_servizi.php?id=51	178	government	0	0	0	0	1	0	0	1	1	2
http://www.notiziediprato.it/news/muore-subito-dopo-aver-ricevuto-il-vaccino-antiinfluenzale-caso-sospetto-a-prato	179	journalism	0	0	0	0	1	0	0	1	1	2
http://www.youtube.com/watch?v=t_kpPBZ8ngM	180	other	0	0	0	0	1	0	0	0	1	1
http://www.newnotizie.it/2014/11/il-vaccino-antinfluenzale-e-quattro-morti-sospette-attenzione-ai-due-lotti-incriminati/	181	journalism	0	0	0	0	1	1	0	1	1	3
http://www.canicattiweb.com/2014/11/28/sicilia-2-morti-sospette-alt-a-2-lotti-del-vaccino-antinfluenzale/	182	journalism	0	0	0	0	1	0	0	0	1	1
http://www.ulss16.padova.it/all/vaccinazione_antinfluenzale.pdf	183	government	1	0	0	0	0	1	0	1	1	3
http://www.picusonline.it/visualizza/35609.html	184	journalism	0	0	0	0	1	0	0	1	1	2
http://www.trevisotoday.it/cronaca/morti-vaccino-influenzale-oggi-27novembre-veneto.html	185	journalism	0	0	0	0	1	0	0	1	1	2
http://www.latinatoday.it/cronaca/vaccino-antinfluenzale-ritirato-intervento-regione-lazio.html	186	journalism	0	0	0	0	1	1	0	1	1	3
http://www.lav.it/news/vaccino-antinfluenzale-diffida-ministro	187	other	0	0	0	0	1	0	0	1	0	1
http://www.aslcremona.it/TEMPL_infodet.asp?IDLivello1=66&IDLivello2=490&IDLivello3=0&IDLT=1&IDInfo=3650	188	government	0	0	0	0	1	0	0	1	1	2
http://www.dagospia.com/rubrica-29/cronache/cosa-ha-causato-morte-tre-persone-che-hanno-usato-vaccino-89629.htm	189	other	1	0	0	0	0	0	0	0	1	1
http://www.resegoneonline.it/articoli/Vaccino-antinfluenzale-Signorelli-attendere-le-analisi-senza-allarmismi-20141128/	190	journalism	0	0	0	0	1	1	0	1	1	3
http://www.lopinionista.it/notizie/pescara-sospensione-somministrazione-lotto-n-142701-del-vaccino-antinfluenzale-fluad-269783.html	191	journalism	0	0	0	0	1	0	0	1	1	2
http://www3.varesenews.it/salute/l-asl-assicura-non-abbiamo-il-vaccino-antinfluenzale-sospetto-301535.html	192	journalism	0	0	0	0	1	0	0	1	1	2
http://www.fctorinospa.it/confermata-sicurezza-vaccino-antinfluenzale/	193	government	1	0	0	0	0	0	1	1	1	3
http://www.abruzzoweb.it/contenuti/vaccino-antinfluenzale-tre-morti--sospette-una-in-molise-sospesi-lotti/558547-283/	194	journalism	0	0	0	0	1	0	0	1	1	2
http://www.udinetoday.it/cronaca/vaccino-antinfluenzale-benefici-controindicazioni-effetti-collaterali.html	195	journalism	0	0	0	0	1	0	0	1	1	2
http://www.focus.it/scienza/salute/vaccini-anti-influenzali-e-morti-sospette-che-cosa-ce-da-sapere	196	journalism	1	0	0	0	0	1	1	1	1	4
http://popoffquotidiano.it/2014/11/28/vaccino-antinfluenzale-novartis-4-morti-sospette/	197	other	0	0	0	0	1	1	0	1	1	3
http://www.corriereadriatico.it/MARCHE/vaccino_antinfluenzale_morti_marche_caso/notizie/1037536.shtml	198	journalism	0	0	0	0	0	0	0	1	0	1
http://salute-benessere.excite.it/vaccino-antinfluenzale-fluad-scagionato-dai-test-delliss-nessun-rischio-per-la-salute-N155455.html	199	other	0	0	0	0	1	1	0	1	1	3
http://www.regione.piemonte.it/sanita/cms2/notizie-87209/notizie-dallassessorato/2867-al-via-la-vaccinazione-antinfluenzale-in-piemonte	200	government	1	0	0	0	0	0	1	1	1	3
